# Supplementary material for: Aggregation-induced emission: mechanistic study of the clusteroluminescence of tetrathienylethene
Source: PubMed Central journal article supplement (PMC5431705; doi:10.1039/c6sc05192h), 2017-01-11
Supplement: SC-008-C6SC05192H-s001.pdf [file SC-008-C6SC05192H-s001.pdf]

# Aggregation-Induced Emission: Mechanistic Study of Clusteroluminescence of Tetrathienylethene

Lucia Viglianti,<sup>abe†</sup> Nelson L. C. Leung,<sup>ab†</sup> Ni Xie,<sup>ab</sup> Xinggui Gu,<sup>ab</sup> Herman H. Y. Sung,<sup>b</sup> Qian Miao,<sup>d</sup> Ian D. Williams,<sup>b</sup> Emanuela Licandro,<sup>e</sup> and Ben Zhong Tang<sup>abc\*</sup>

<sup>a</sup>HKUST Shenzhen Research Institute, No. 9 Yuexing 1st Road, South Area, Hi-tech Park, Nanshan, Shenzhen 518057, China.

<sup>b</sup>Department of Chemistry, Hong Kong Branch of Chinese National Engineering Research Center for Tissue Restoration and Reconstruction, Institute for Advanced Study, Division of Biomedical Engineering, Division of Life Science, State Key Laboratory of Molecular Neuroscience, Institute of Molecular Functional Materials, The Hong Kong University of Science and Technology, Clear Water Bay, Kowloon, Hong Kong, China.

<sup>c</sup>Guangdong Innovative Research Team, SCUT-HKUST Joint Research Laboratory, State Key Laboratory of Luminescent Materials and Devices, South China University of Technology, Guangzhou 510640, China.

<sup>d</sup>Department of Chemistry, The Chinese University of Hong Kong, Shatin, New Territories, Hong Kong, China.

<sup>e</sup>Dipartimento di Chimica, Università degli Studi di Milano, Via Golgi 19, 20133, Milano, Italy.

\*Correspondence: tangbenz@ust.hk

## Supporting Information

### Index

|                                                                                                                                       |    |
|---------------------------------------------------------------------------------------------------------------------------------------|----|
| Figure SI1: Comparison between the photoluminescence spectra of TTE and TPE in THF/water $f_w$ 99%;                                   | 3  |
| Figure SI2: Single-crystal of TPE                                                                                                     |    |
| Figure SI3: CH $\cdots\pi$ interaction in TPE crystal structure                                                                       | 4  |
| Figure SI4: Dihedral angle between S1 ring and the double bond plane in TTE single-crystal                                            |    |
| Figure SI5: The photoluminescence (PL) spectra of DTE in THF and THF/water mixtures with increasing water fractions ( $f_w$ ) to 90%. | 5  |
| Figure SI6: The photoluminescence (PL) spectrum of DTE in aggregate, and crystal state. Excitation at 322 nm.                         |    |
| Figure SI7: ORTEP picture of DTE crystal.                                                                                             | 6  |
| Figure SI8: Molecular planes of the double bond and thiophene rings, and the related dihedral angle.                                  |    |
| Figure SI9: Packing in DTE crystal.                                                                                                   | 7  |
| Figure SI10: CH $\cdots\pi$ interactions in DTE crystal.                                                                              |    |
| Figure SI11: CH $\cdots$ S interactions in DTE crystal.                                                                               |    |
| Figure SI12: S $\cdots$ S interactions in DTE crystal.                                                                                | 8  |
| Figure SI13: ORTEP picture of sl-TTE crystal.                                                                                         | 9  |
| Figure SI14: Angle between the molecular planes in sl-TTE crystal.                                                                    |    |
| Figure SI15: Packing in sl-TTE crystal.                                                                                               | 10 |
| Figure SI16: intra and inter-molecular $\pi\cdots\pi$ interactions in sl-TTE crystal.                                                 |    |
| Figure SI17 intermolecular CH $\cdots\pi$ interactions in sl-TTE crystal.                                                             | 11 |
| Figure SI18 intermolecular CH $\cdots$ S interactions in sl-TTE crystal.                                                              |    |
| Figure SI19 intra and inter-molecular S $\cdots$ S interactions in sl-TTE crystal.                                                    | 12 |

|                                                                                                         |    |
|---------------------------------------------------------------------------------------------------------|----|
| Figure SI20 Photograph of fl-TTE (left) and TTE (right) in powder state.                                | 13 |
| Figure SI21 Photoluminescence spectrum of fl-TTE in powder state.                                       |    |
| Figure SI22 Crystal structure of fl-TTE.                                                                | 14 |
| Figure SI23 Molecular plane in the asymmetric unit of fl-TTE crystal structure                          |    |
| Figure SI24 Molecular plane in the unit cell of fl-TTE crystal structure.                               | 15 |
| Figure SI25 Packing of fl-TTE in the crystal.                                                           |    |
| Figure SI26 $\pi \cdots \pi$ interactions in fl-TTE crystal.                                            | 16 |
| Figure SI27 $\text{CH} \cdots \pi$ interactions in fl-TTE crystal.                                      |    |
| Figure SI28 $\text{S} \cdots \text{S}$ interactions in fl-TTE crystal.                                  | 17 |
| Figure SI29 Molar Absorptivity of TTE in THF.                                                           |    |
| Figure SI30 Molar Absorptivity of sl-TTE in THF.                                                        | 18 |
| Figure SI31 Molar Absorptivity of fl-TTE in THF.                                                        |    |
| Figure SI32 Molar absorptivity comparison of fl-TTE, sl-TTE and TTE in THF.                             | 19 |
| Table S1 Absorption values and energy gap of the investigated molecules                                 |    |
| Figure SI33 X-ray diffraction spectra of the THF/water ( $f_w = 90\%$ ) aggregates and crystals of TTE. | 20 |
| TTE crystal data                                                                                        | 21 |
| DTE crystal data                                                                                        | 27 |
| sl-TTE crystal Data                                                                                     | 30 |
| Materials and general information                                                                       | 36 |
| Instruments                                                                                             |    |
| Experimental Procedures                                                                                 |    |

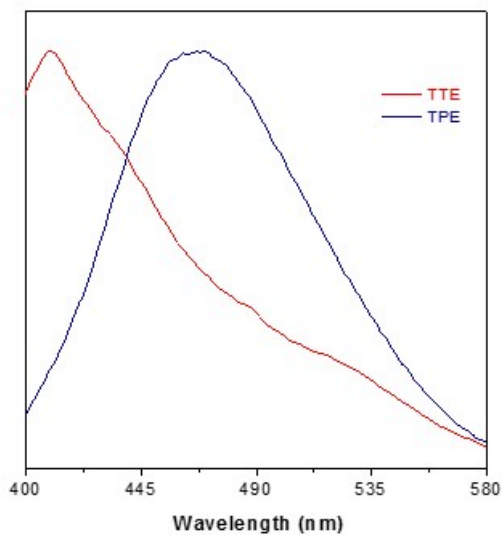

**Figure S11.** The photoluminescence (PL) spectra of TTE and TPE in THF/water with 99 % of water fractions.

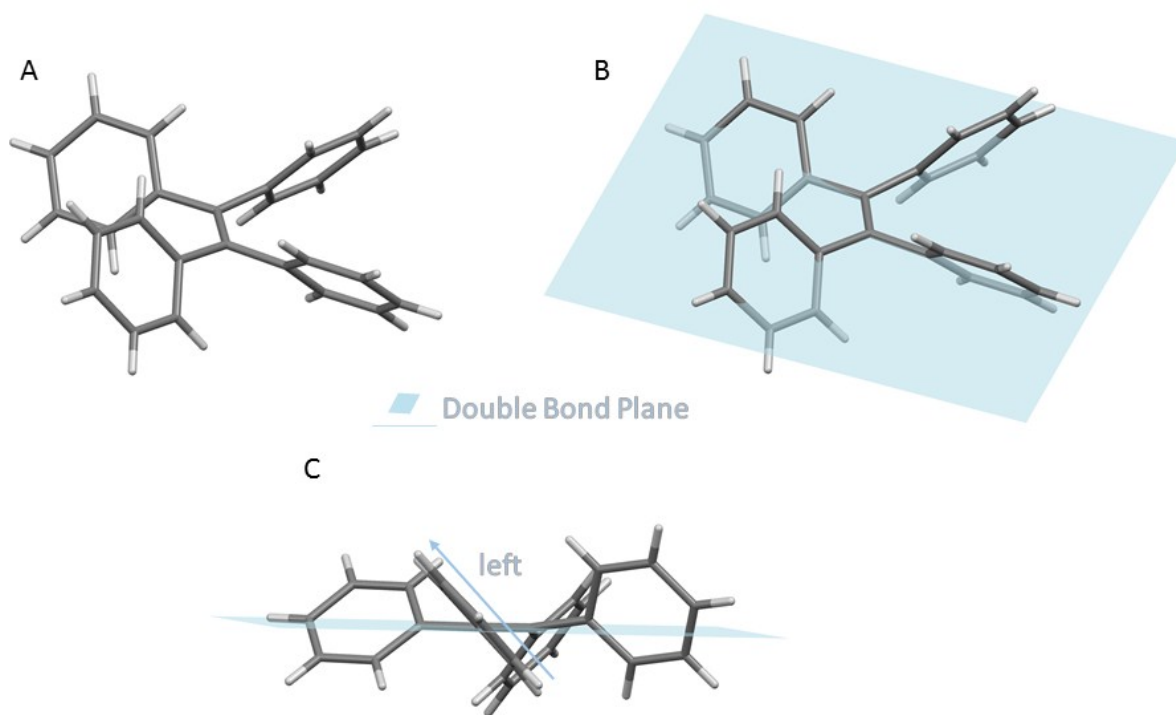

**Figure S12.** Single-crystal of TPE: (A) general view, (B) top view, and (C) side view of ring direction with respect to the double bond plane.

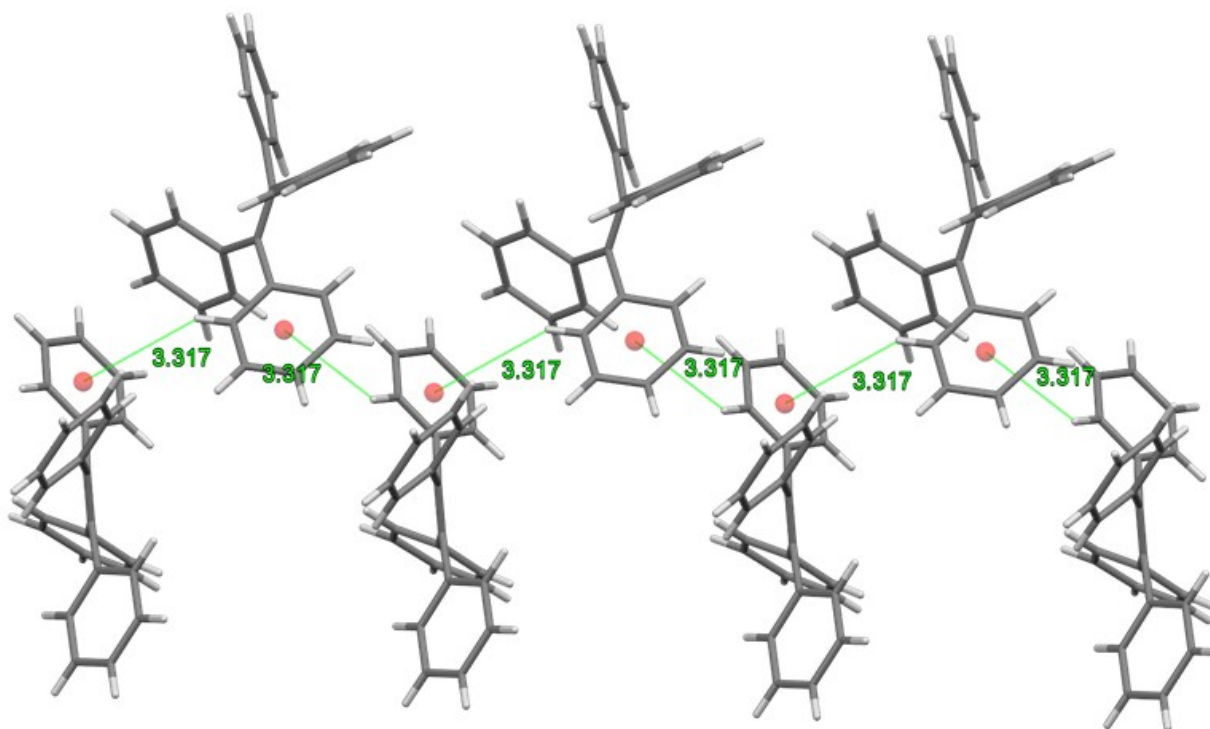

**Figure S13.** CH... $\pi$  interactions in TPE crystal for one of the four phenyl rings.

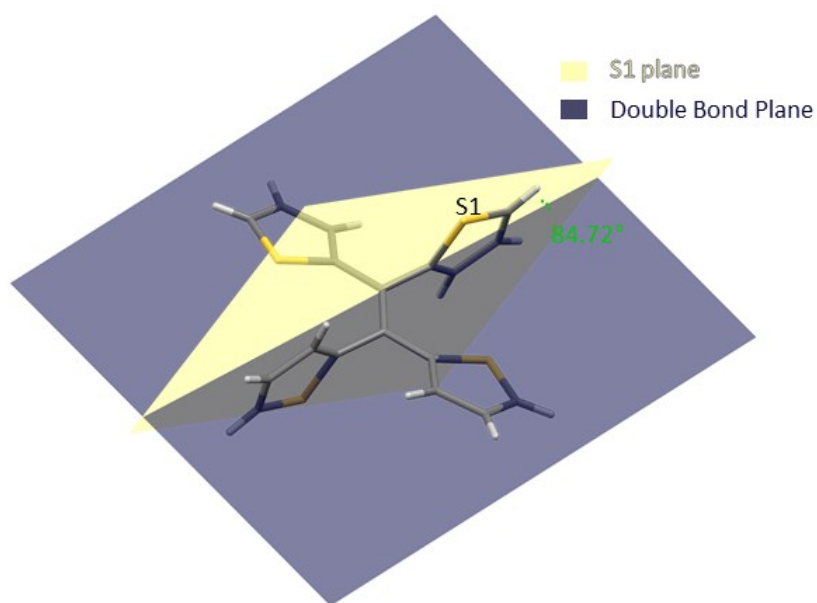

**Figure S14.** Dihedral angle between the S1 ring and the double bond plane in TTE single-crystal.

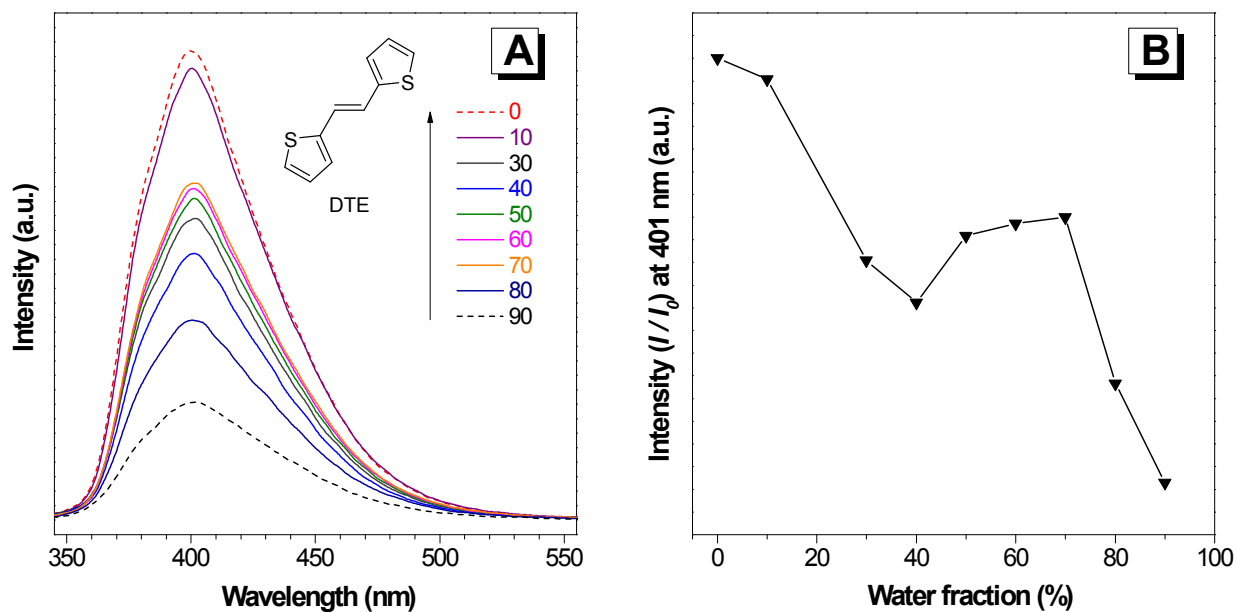

**Figure S15.** (A) The photoluminescence (PL) spectra of DTE in THF and THF/water mixtures with increasing water fractions ( $f_w$ ) to 90%. (B) Change in PL intensity of DTE at 401 nm versus water fraction in THF/water mixtures. Excitation at 322 nm.

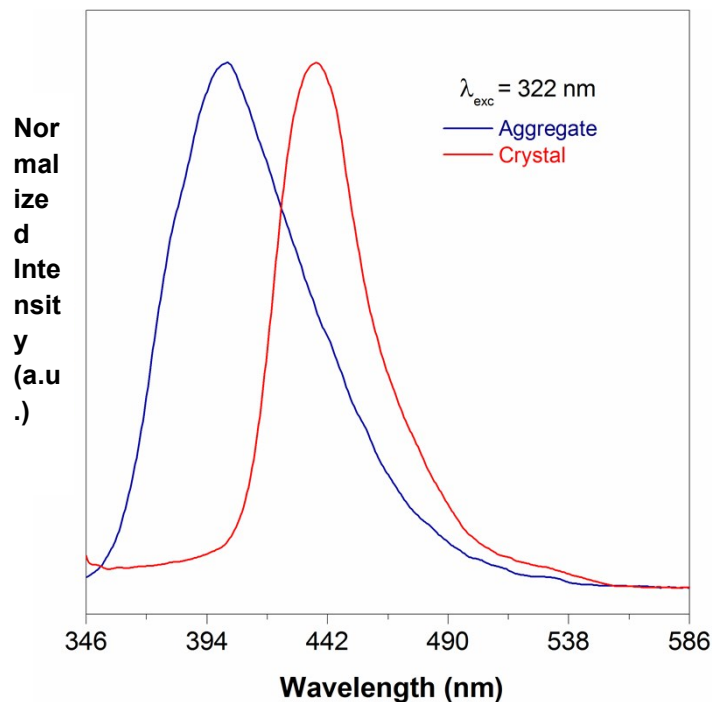

**Figure S16.** The photoluminescence (PL) spectrum of DTE in aggregate, and crystal state. Excitation at 322 nm.

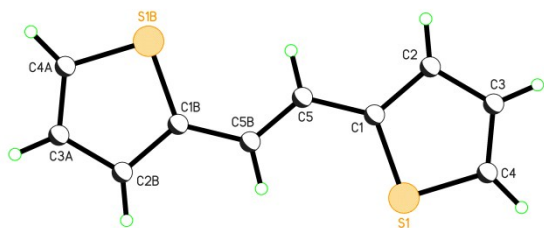

**Figure SI7.** ORTEP picture of DTE crystal.

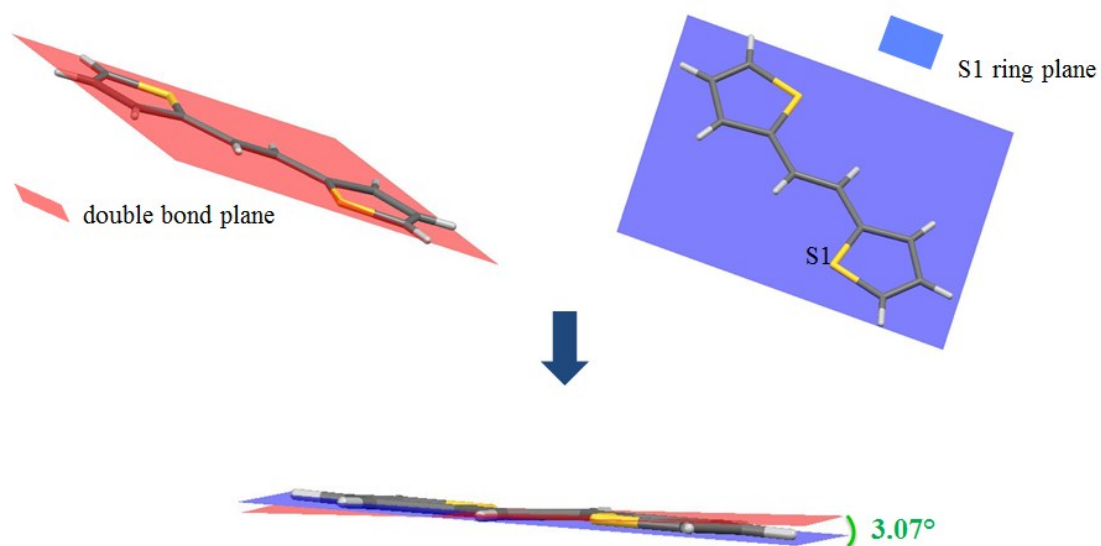

**Figure SI8.** Molecular planes of the double bond and thiophene rings, and the related dihedral angle.

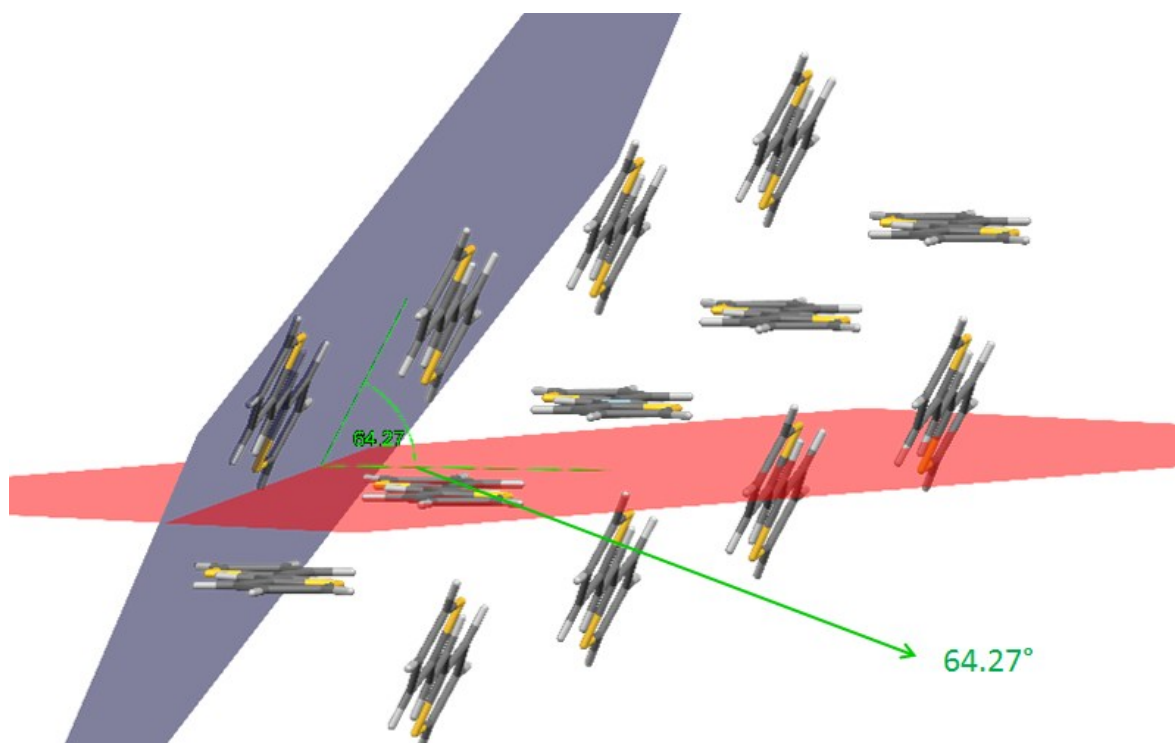

**Figure S19.** Packing in DTE crystal.

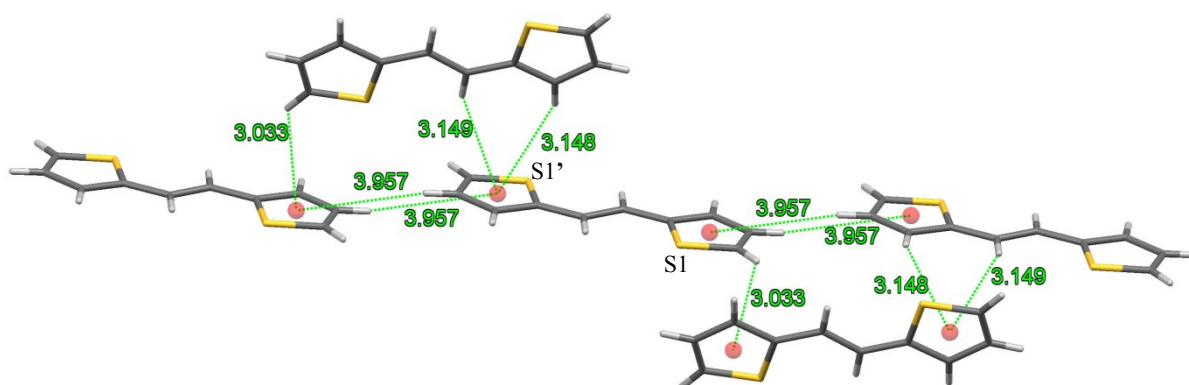

**Figure S110.** CH... $\pi$  interactions in DTE crystal.

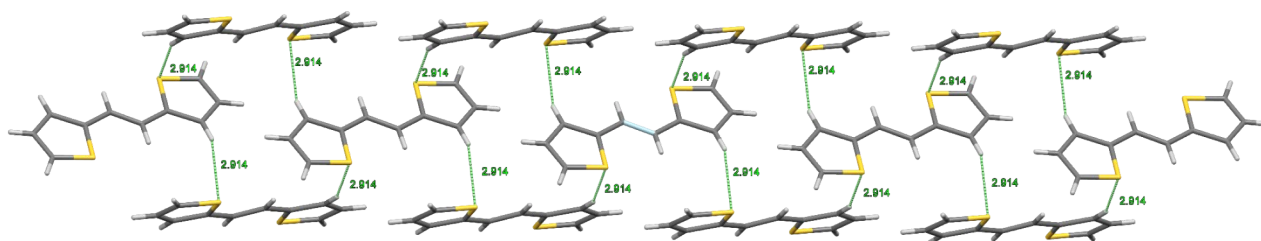

**Figure S111.** CH...S interactions in DTE crystal. The measured distance is 2.914 Å.

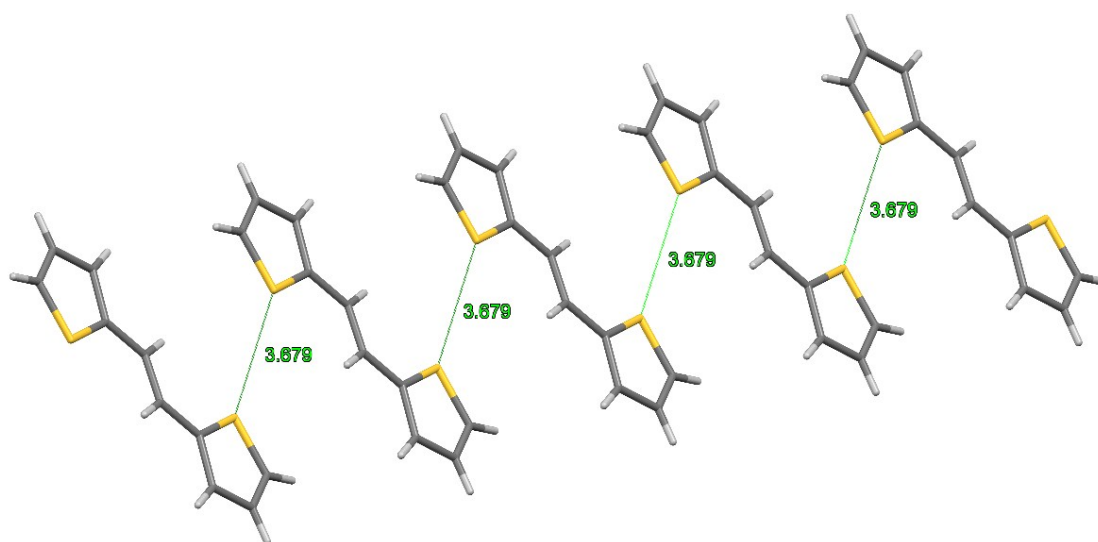

**Figure SI12.** S...S interactions in DTE crystal. The measured distance is 3.679 Å.



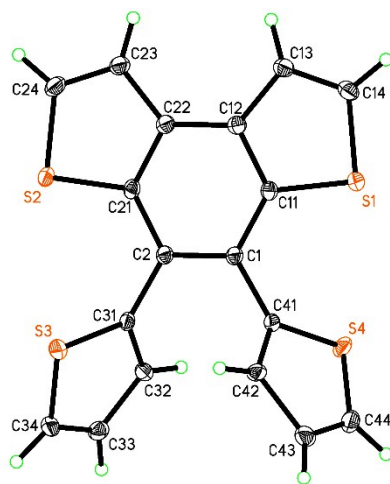

**Figure SI13.** ORTEP picture of sl-TTE crystal.

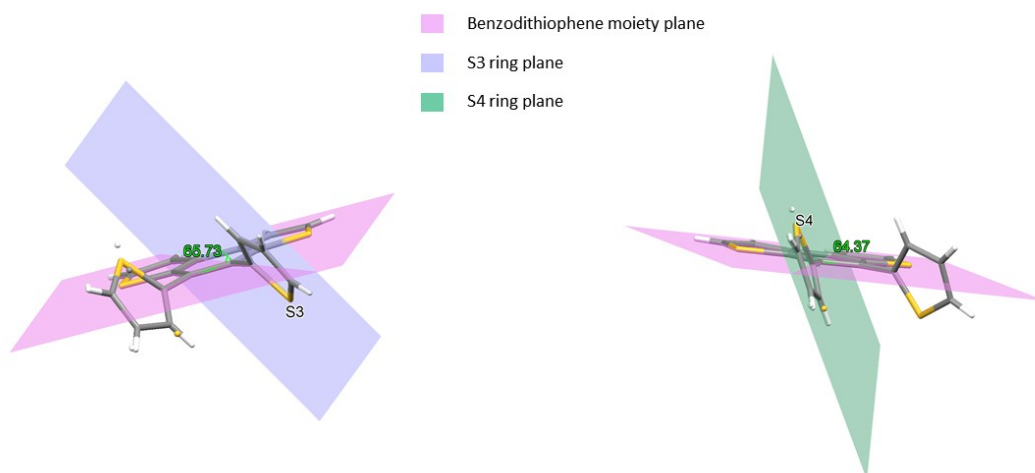

**Figure SI14.** Angle between S3 (left) and S4 (right) ring planes and benzodithiophene moiety plane (66° and 64° respectively) in sl-TTE crystal.

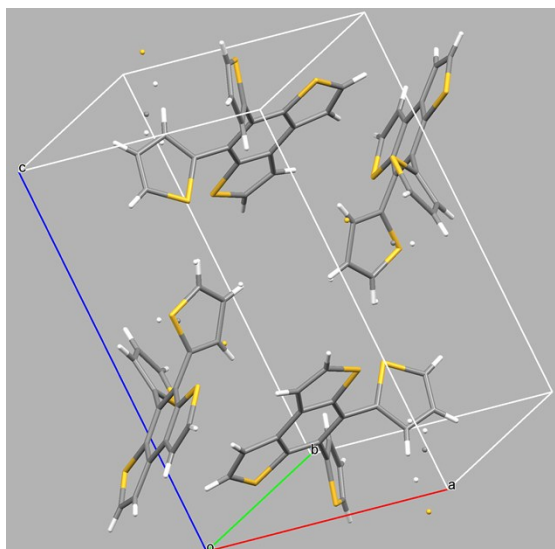

**Figure SI15.** Packing in sl-TTE crystal.

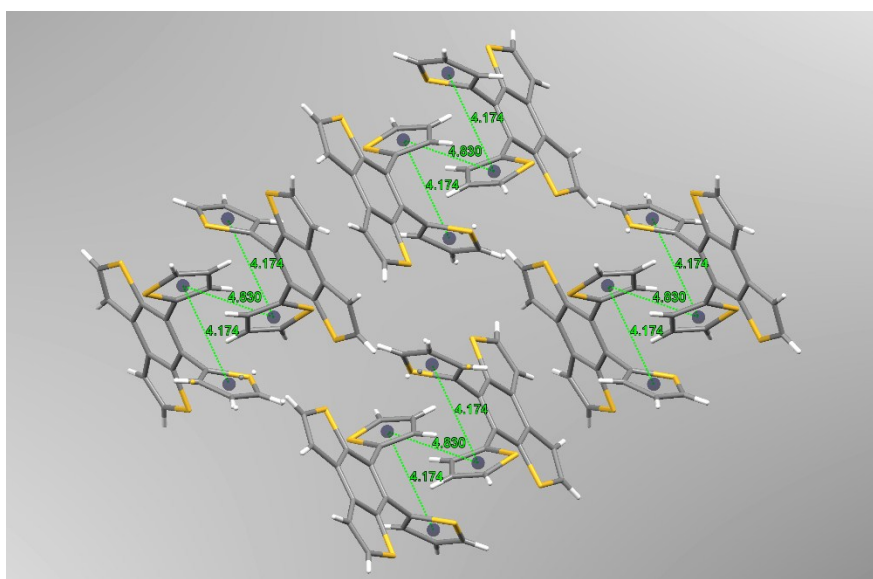

**Figure SI16.** *intra* and *inter*-molecular  $\pi$  $\cdots\pi$  interactions in sl-TTE crystal.

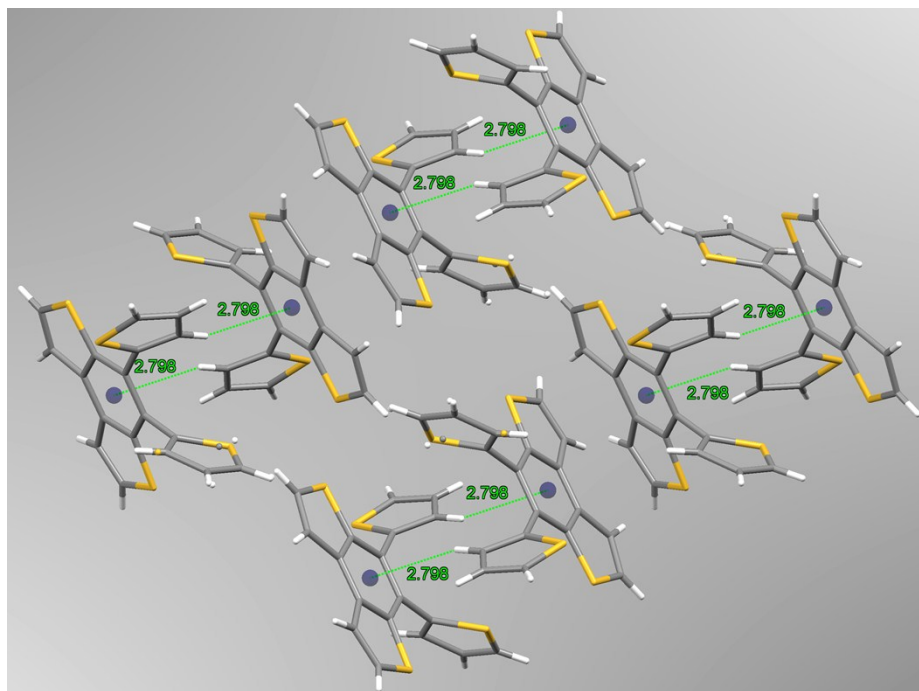

**Figure SI17.** *intermolecular CH...π interactions in sl-TTE crystal.*

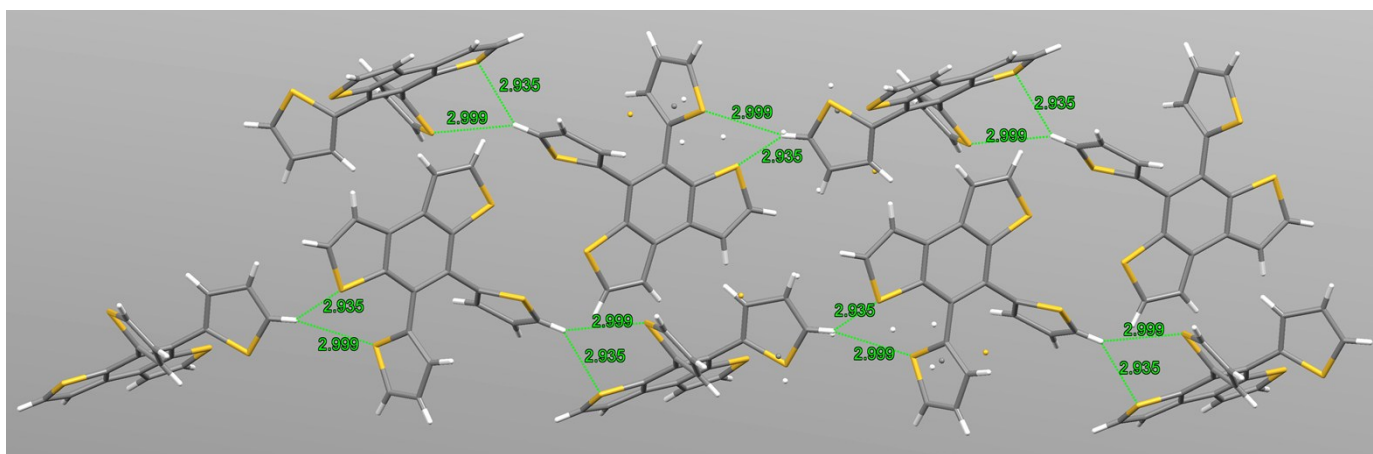

**Figure SI18.** *intermolecular CH...S interactions in sl-TTE crystal.*

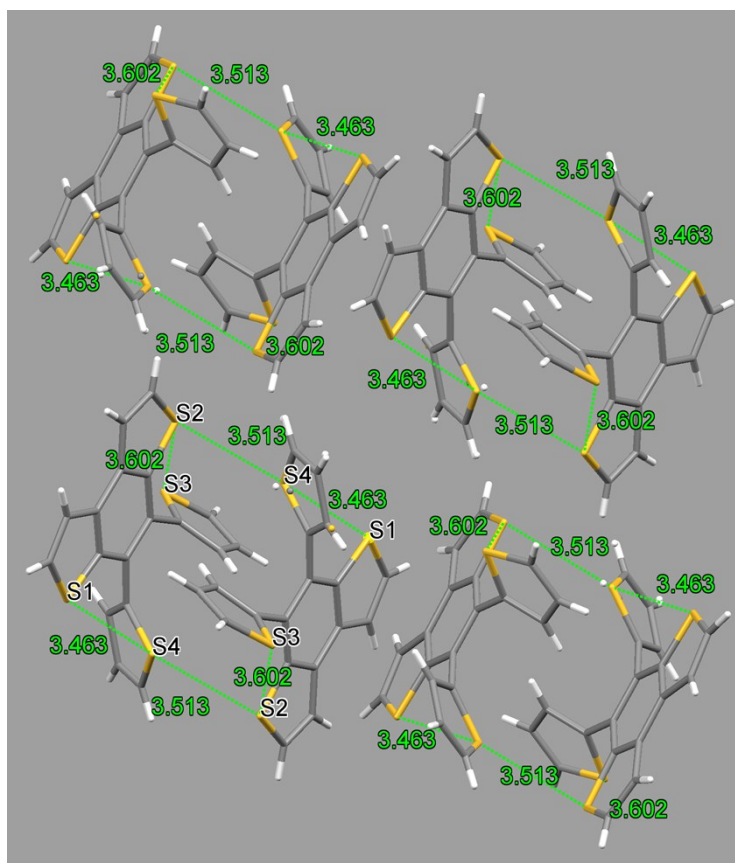

**Figure S119.** *intra* and *inter*-molecular S...S interactions in sl-TTE crystal.

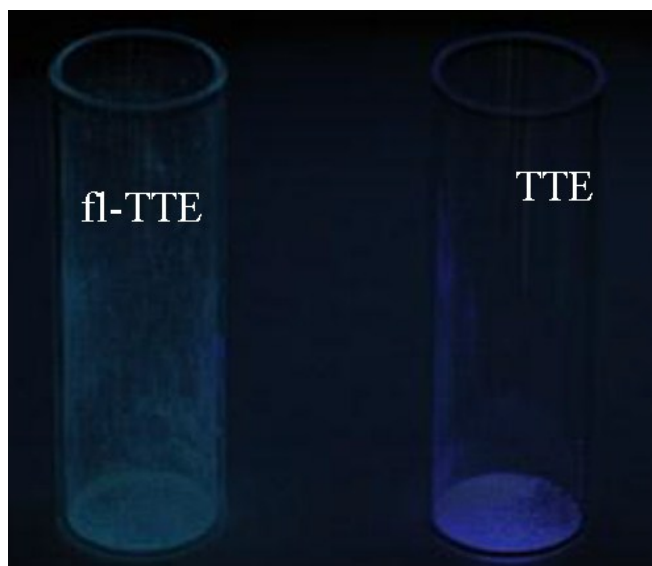

**Figure S120.** Photograph of fl-TTE (left) and TTE (right) in powder state, taken under 365 nm UV-light illumination.

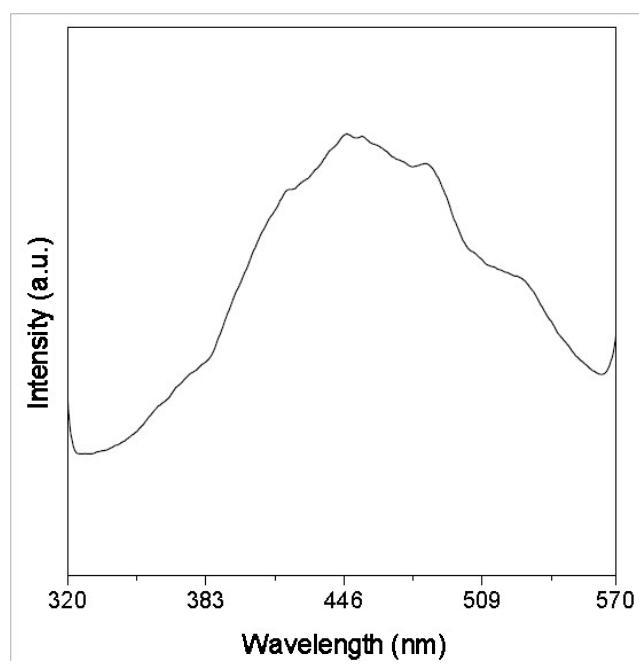

**Figure S121.** Photoluminescence spectrum of fl-TTE in powder state.

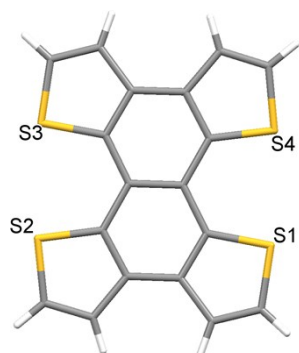

**Figure S122.** Crystal structure of fl-TTE.

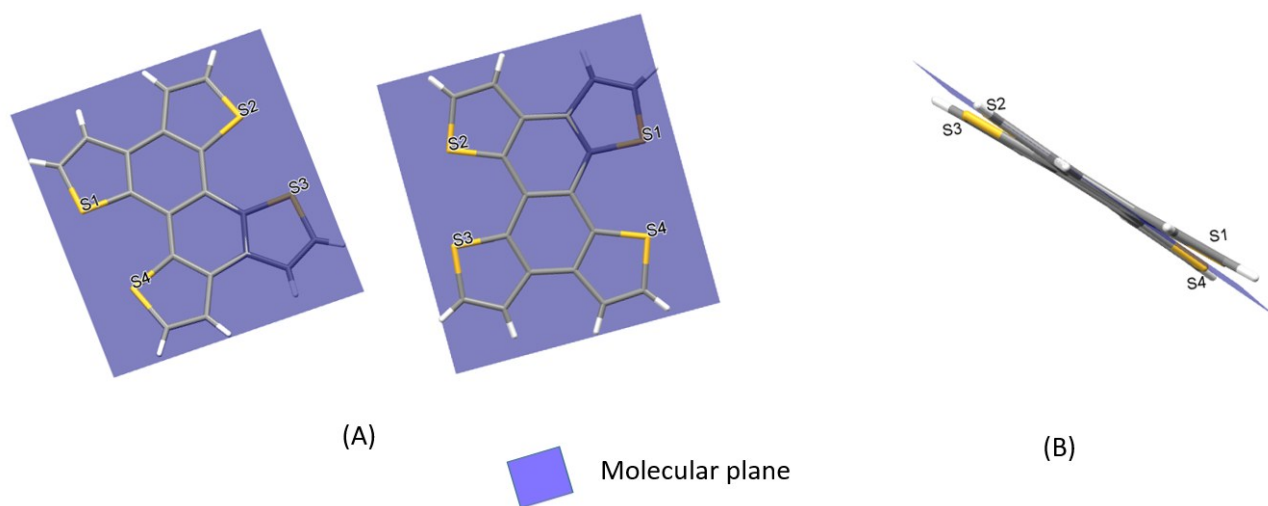

**Figure S123.** Molecular plane in the asymmetric unit of fl-TTE crystal structure. S1 and S3 are out of the plane. (A) top views, (B) side view.

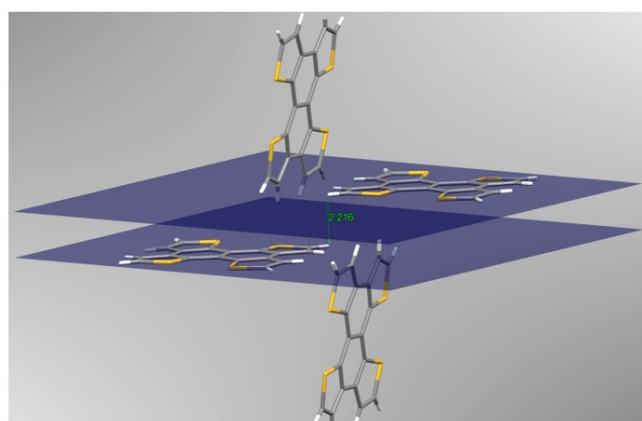

(A)

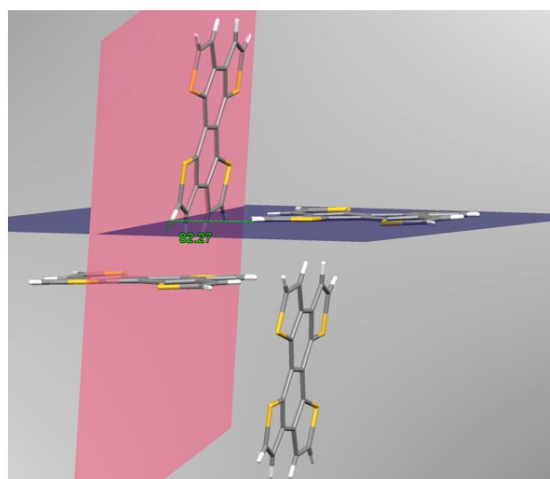

(B)

**Figure SI24.** Molecular plane in the unit cell of fl-TTE in the crystal structure. (A) Horizontal planes (distance 2.216 Å), (B) intersection between horizontal and vertical plane (angle 83°).

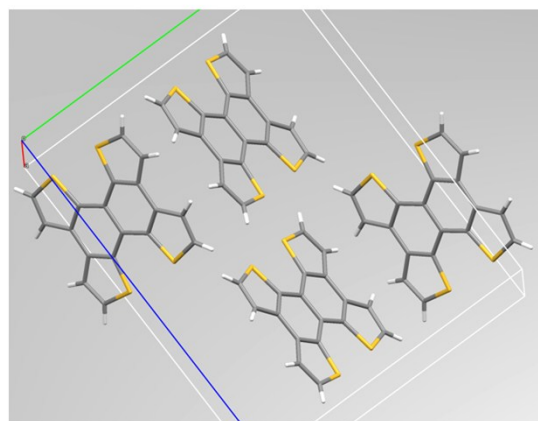

(A)

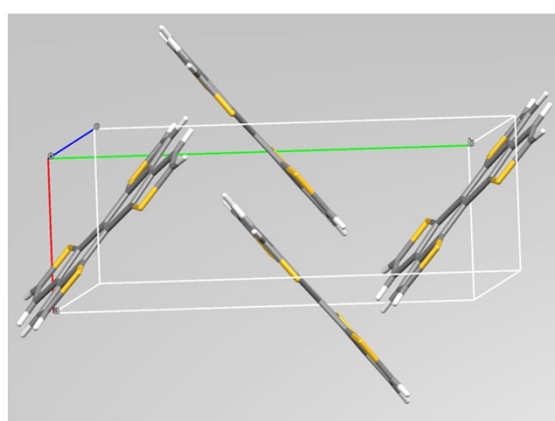

(B)

**Figure SI25.** Packing of fl-TTE crystal. (A) top view, (B) side view.

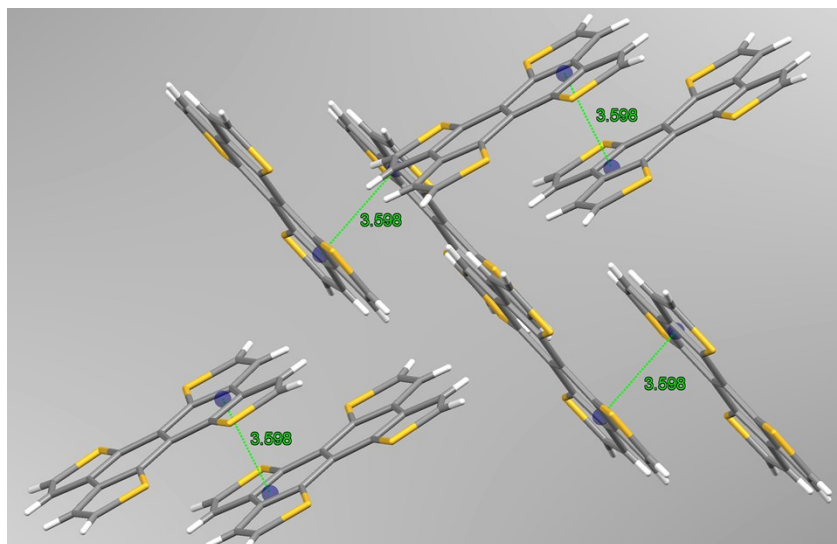

**Figure SI26.**  $\pi \cdots \pi$  interactions in fl-TTE crystal.

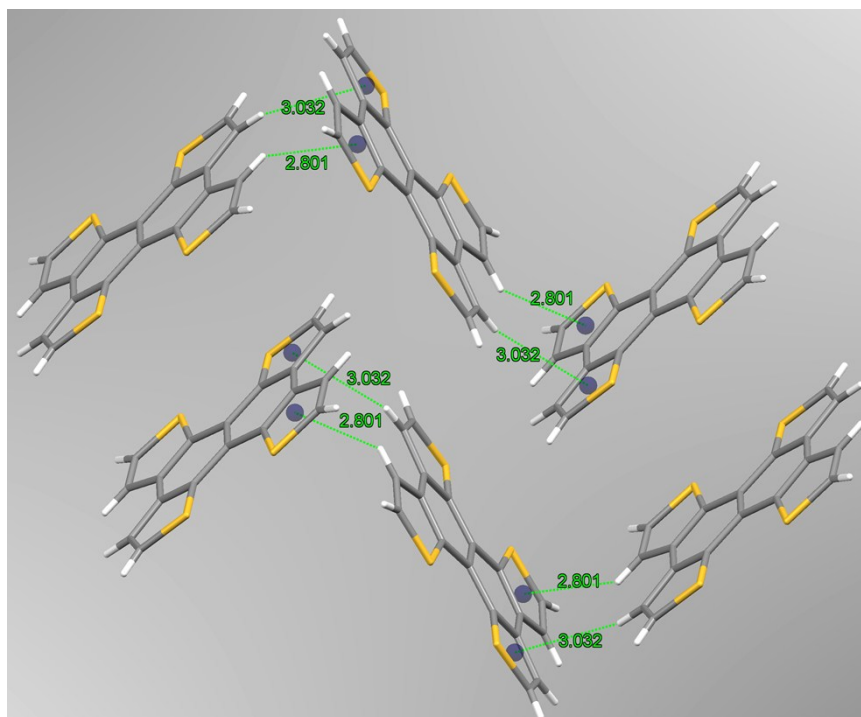

**Figure SI27.** CH $\cdots$  $\pi$  interactions in fl-TTE crystal.



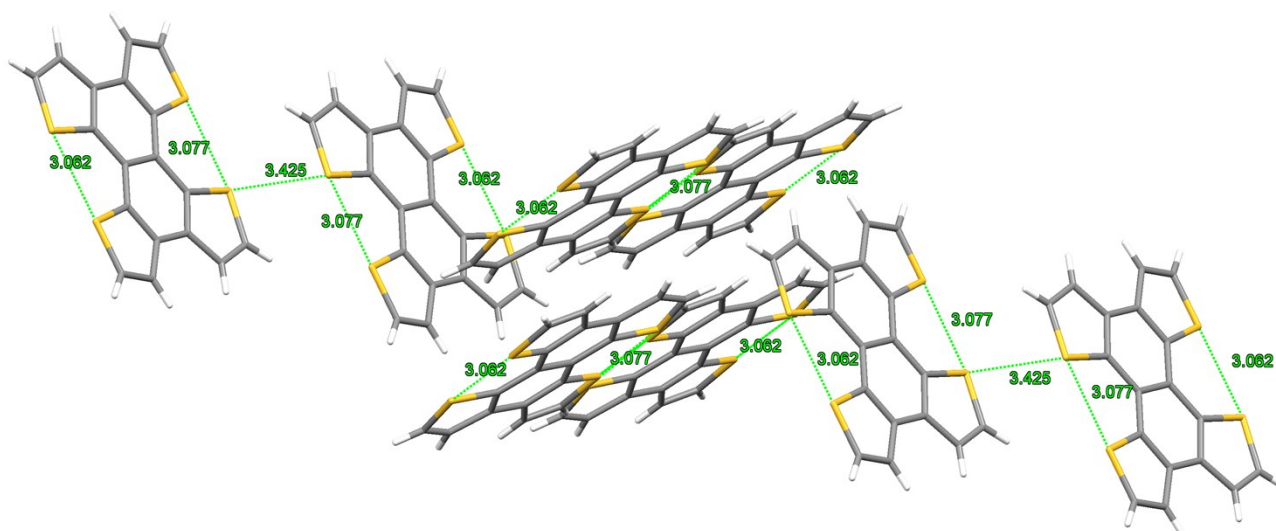

Figure SI28. S...S interactions in fl-TTE crystal.

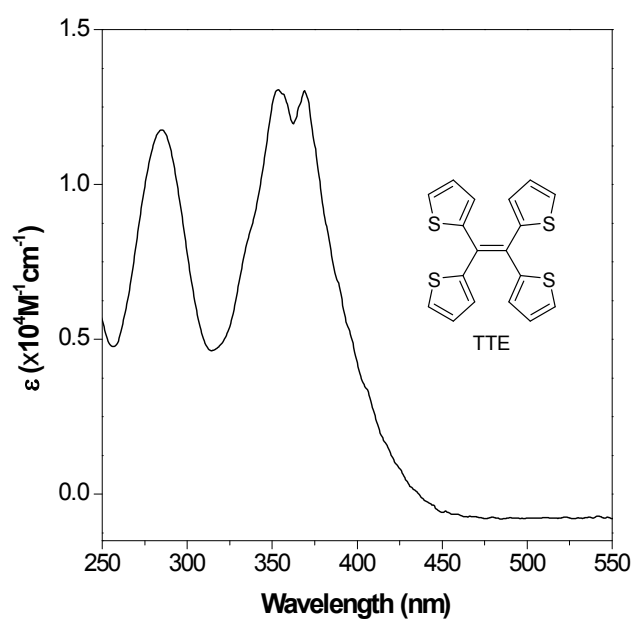

Figure SI29. Molar Absorptivity of TTE in THF.

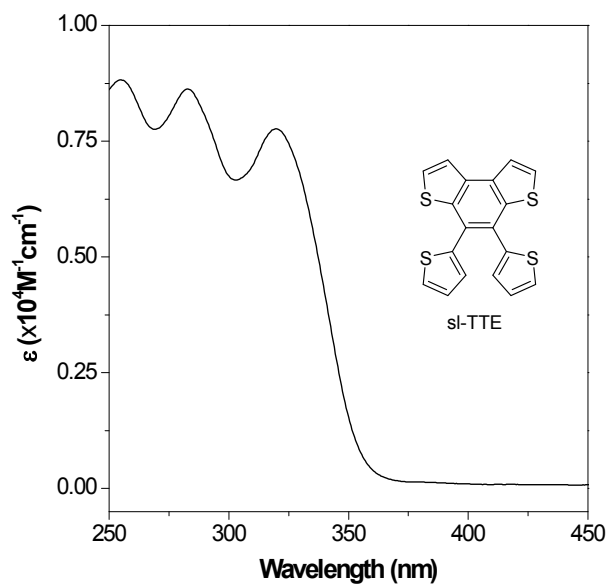

Figure SI30. Molar Absorptivity of sl-TTE in THF.

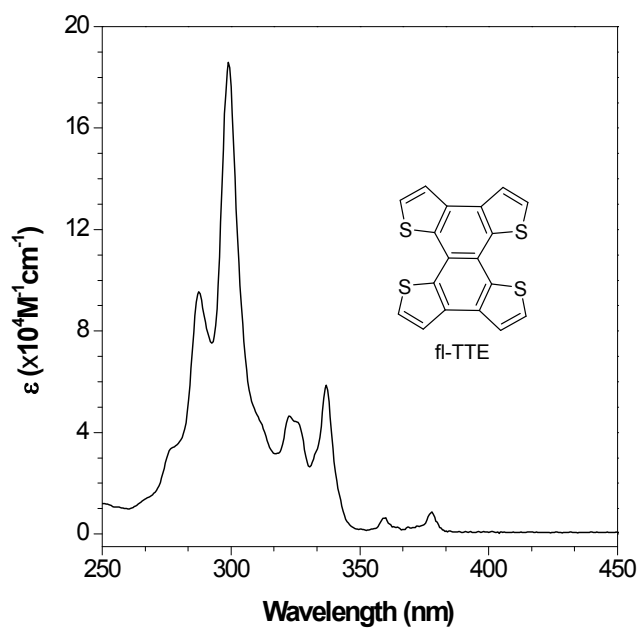

Figure SI31. Molar Absorptivity of fl-TTE in THF.

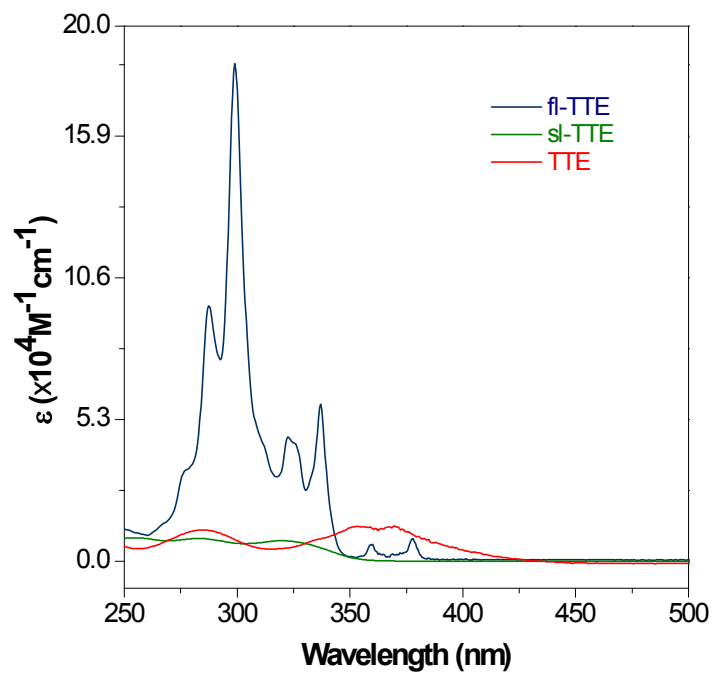

**Figure SI32.** Molar absorptivity comparison of fl-TTE, sl-TTE and TTE in THF.

**Table SII.** Absorption values and energy gap of the investigated molecules: TPE, TTE, sl-TTE, fl-TTE and DTE.

|        | $\lambda_{\text{abs}}$ (nm)<br>onset values | $\lambda_{\text{abs}}$ (nm)<br>peak values | Optical Energy Gap (eV)<br>from onset values | Optical Energy Gap (eV)<br>from peak values |
|--------|---------------------------------------------|--------------------------------------------|----------------------------------------------|---------------------------------------------|
| TPE    | 360                                         | 308                                        | 3.45                                         | 4.03                                        |
| TTE    | 413                                         | 364                                        | 3.01                                         | 3.41                                        |
| sl-TTE | 359                                         | 320                                        | 3.46                                         | 3.88                                        |
| fl-TTE | 382                                         | 378                                        | 3.25                                         | 3.28                                        |
| DTE    | 377                                         | 344                                        | 3.29                                         | 3.61                                        |

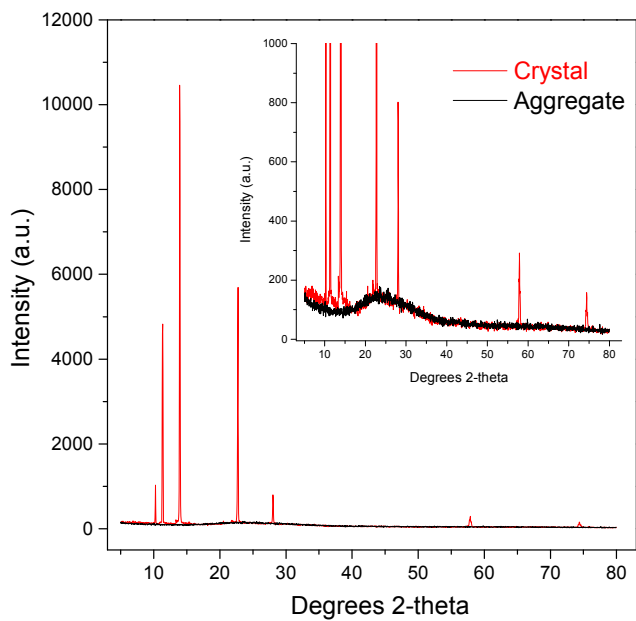

**Figure SI33.** X-ray diffraction spectra of the THF/water ( $f_w = 90\%$ ) aggregates and crystals of TTE. Inset: enlarged spectra for clarity. The THF/water aggregates are amorphous in nature.

## TTE Crystal Data

|                                             |                                                                |
|---------------------------------------------|----------------------------------------------------------------|
| Identification code                         | TTE                                                            |
| Empirical formula                           | C <sub>18</sub> H <sub>12</sub> S <sub>4</sub>                 |
| Formula weight                              | 356.52                                                         |
| Temperature/K                               | 100.0(4)                                                       |
| Crystal system                              | monoclinic                                                     |
| Space group                                 | P2 <sub>1</sub> /n                                             |
| a/Å                                         | 9.3160(2)                                                      |
| b/Å                                         | 9.10329(18)                                                    |
| c/Å                                         | 9.6346(2)                                                      |
| $\alpha$ /°                                 | 90.00                                                          |
| $\beta$ /°                                  | 110.853(3)                                                     |
| $\gamma$ /°                                 | 90.00                                                          |
| Volume/Å <sup>3</sup>                       | 763.55(3)                                                      |
| Z                                           | 2                                                              |
| $\rho_{\text{calc}}$ /cm <sup>3</sup>       | 1.551                                                          |
| $\mu$ /mm <sup>-1</sup>                     | 5.633                                                          |
| F(000)                                      | 368.0                                                          |
| Crystal size/mm <sup>3</sup>                | 0.25 × 0.22 × 0.17                                             |
| Radiation                                   | CuK $\alpha$ ( $\lambda$ = 1.54184)                            |
| 2 $\theta$ range for data collection/°      | 11.34 to 133.94                                                |
| Index ranges                                | -10 ≤ h ≤ 11, -10 ≤ k ≤ 7, -11 ≤ l ≤ 11                        |
| Reflections collected                       | 3875                                                           |
| Independent reflections                     | 1353 [ $R_{\text{int}}$ = 0.0145, $R_{\text{sigma}}$ = 0.0151] |
| Data/restraints/parameters                  | 1353/2/108                                                     |
| Goodness-of-fit on F <sup>2</sup>           | 1.000                                                          |
| Final R indexes [ $I \geq 2\sigma(I)$ ]     | $R_1 = 0.0250$ , $wR_2 = 0.0641$                               |
| Final R indexes [all data]                  | $R_1 = 0.0261$ , $wR_2 = 0.0648$                               |
| Largest diff. peak/hole / e Å <sup>-3</sup> | 0.38/-0.22                                                     |

| <b>Table S13 Fractional Atomic Coordinates (<math>\times 10^4</math>) and Equivalent Isotropic Displacement Parameters (<math>\text{\AA}^2 \times 10^3</math>) for TTE. <math>U_{\text{eq}}</math> is defined as 1/3 of the trace of the orthogonalized <math>U_{\text{IJ}}</math> tensor.</b> |                 |                 |                 |                                  |
|------------------------------------------------------------------------------------------------------------------------------------------------------------------------------------------------------------------------------------------------------------------------------------------------|-----------------|-----------------|-----------------|----------------------------------|
| <b>Atom</b>                                                                                                                                                                                                                                                                                    | <b><i>x</i></b> | <b><i>y</i></b> | <b><i>z</i></b> | <b><math>U(\text{eq})</math></b> |
| S1                                                                                                                                                                                                                                                                                             | 2587.0(4)       | 1554.3(4)       | 4207.7(4)       | 14.32(13)                        |
| S2                                                                                                                                                                                                                                                                                             | 1028.6(5)       | -22.1(5)        | 8353.0(5)       | 16.62(14)                        |
| S2A                                                                                                                                                                                                                                                                                            | 814(18)         | 2853(14)        | 7092(15)        | 9(3)                             |
| C1                                                                                                                                                                                                                                                                                             | 332.7(18)       | 648.3(19)       | 5289.3(18)      | 11.7(3)                          |
| C1A                                                                                                                                                                                                                                                                                            | 10(30)          | -160(30)        | 5740(30)        | 9(5)                             |
| C2                                                                                                                                                                                                                                                                                             | 797.9(18)       | 1722.3(17)      | 4355.5(18)      | 14.0(3)                          |
| C3                                                                                                                                                                                                                                                                                             | 42.1(19)        | 2949.1(18)      | 3614.2(18)      | 15.4(3)                          |
| C4                                                                                                                                                                                                                                                                                             | 929.8(19)       | 3721.6(18)      | 2902.8(18)      | 14.7(3)                          |
| C5                                                                                                                                                                                                                                                                                             | 2313.3(19)      | 3097.3(18)      | 3131.7(18)      | 15.2(3)                          |
| C6                                                                                                                                                                                                                                                                                             | 693.9(17)       | 1120.4(18)      | 6840.4(18)      | 13.3(3)                          |
| C7                                                                                                                                                                                                                                                                                             | 910(5)          | 2589(5)         | 7298(5)         | 15.9(8)                          |
| C8                                                                                                                                                                                                                                                                                             | 1309.4(19)      | 2732.2(19)      | 8874.5(19)      | 17.1(3)                          |

|    |            |            |            |         |
|----|------------|------------|------------|---------|
| C9 | 1428.8(19) | 1413.3(19) | 9560.8(19) | 17.8(4) |
|----|------------|------------|------------|---------|

**Table SI4 Anisotropic Displacement Parameters ( $\text{\AA}^2 \times 10^3$ ) for TTE. The Anisotropic Displacement Factor Exponent Takes the Form:  $-2\pi^2 [\text{h}^2 \text{a}^2 \text{U}_{11} + 2\text{hka} \cdot \text{b} \cdot \text{U}_{12} + \dots]$ .**

| Atom | $U_{11}$ | $U_{22}$ | $U_{33}$ | $U_{23}$ | $U_{13}$ | $U_{12}$ |
|------|----------|----------|----------|----------|----------|----------|
| S1   | 13.3(2)  | 14.8(2)  | 17.2(2)  | 2.53(14) | 8.29(16) | 0.98(14) |
| S2   | 21.1(2)  | 15.9(2)  | 13.9(2)  | 1.03(16) | 7.57(18) | 0.87(16) |
| C1   | 10.3(8)  | 12.5(8)  | 13.8(8)  | 2.2(7)   | 6.2(6)   | 2.8(6)   |
| C2   | 12.3(8)  | 15.1(8)  | 16.8(8)  | 0.1(6)   | 7.8(6)   | -1.6(6)  |
| C3   | 14.6(8)  | 15.4(8)  | 17.2(8)  | 1.9(6)   | 6.9(6)   | -3.5(6)  |
| C4   | 16.8(8)  | 13.4(8)  | 14.1(8)  | 1.5(6)   | 5.6(6)   | -1.5(6)  |
| C5   | 16.9(8)  | 15.3(8)  | 15.8(8)  | 1.1(6)   | 8.7(6)   | -3.2(6)  |
| C6   | 10.3(7)  | 16.2(8)  | 14.2(8)  | -0.9(6)  | 5.3(6)   | 0.2(6)   |
| C7   | 10.5(13) | 16.5(18) | 21.9(18) | 1.8(13)  | 7.1(12)  | 0.1(12)  |
| C8   | 14.0(8)  | 18.1(8)  | 18.7(8)  | -6.4(7)  | 5.2(6)   | -0.5(6)  |
| C9   | 15.9(8)  | 24.0(9)  | 13.6(8)  | -2.7(7)  | 5.5(7)   | 1.1(7)   |

| Atom | Atom             | Length/Å   | Atom | Atom             | Length/Å |
|------|------------------|------------|------|------------------|----------|
| S1   | C2               | 1.7292(16) | C1A  | C2 <sup>1</sup>  | 1.59(3)  |
| S1   | C5               | 1.7101(16) | C1A  | C6               | 1.55(3)  |
| S2   | C6               | 1.7260(16) | C2   | C1A <sup>1</sup> | 1.59(3)  |
| S2   | C9               | 1.7005(17) | C2   | C3               | 1.377(2) |
| S2A  | C6               | 1.593(14)  | C3   | C4               | 1.432(2) |
| S2A  | C8               | 1.615(14)  | C4   | C5               | 1.353(2) |
| C1   | C1 <sup>1</sup>  | 1.357(4)   | C6   | C7               | 1.400(4) |
| C1   | C2               | 1.494(2)   | C7   | C8               | 1.436(5) |
| C1   | C6               | 1.474(2)   | C8   | C9               | 1.356(2) |
| C1A  | C1A <sup>1</sup> | 1.45(5)    |      |                  |          |

| Atom             | Atom | Atom             | Angle/°    | Atom | Atom | Atom | Angle/°    |
|------------------|------|------------------|------------|------|------|------|------------|
| C5               | S1   | C2               | 92.13(8)   | C4   | C5   | S1   | 111.82(12) |
| C9               | S2   | C6               | 92.55(8)   | S2A  | C6   | S2   | 119.1(5)   |
| C6               | S2A  | C8               | 94.2(6)    | C1   | C6   | S2   | 126.00(13) |
| C1 <sup>1</sup>  | C1   | C2               | 120.65(19) | C1   | C6   | S2A  | 114.9(5)   |
| C1 <sup>1</sup>  | C1   | C6               | 125.17(19) | C1   | C6   | C1A  | 36.8(9)    |
| C6               | C1   | C2               | 114.17(15) | C1A  | C6   | S2   | 91.7(9)    |
| C1A <sup>1</sup> | C1A  | C2 <sup>1</sup>  | 107(2)     | C1A  | C6   | S2A  | 146.9(11)  |
| C1A <sup>1</sup> | C1A  | C6               | 112(3)     | C7   | C6   | S2   | 110.3(2)   |
| C6               | C1A  | C2 <sup>1</sup>  | 141.2(17)  | C7   | C6   | S2A  | 9.0(6)     |
| C1               | C2   | S1               | 119.12(12) | C7   | C6   | C1   | 123.6(2)   |
| C1               | C2   | C1A <sup>1</sup> | 38.7(9)    | C7   | C6   | C1A  | 155.7(10)  |
| C1A <sup>1</sup> | C2   | S1               | 111.5(9)   | C6   | C7   | C8   | 112.0(3)   |
| C3               | C2   | S1               | 111.04(12) | C7   | C8   | S2A  | 9.2(6)     |
| C3               | C2   | C1               | 129.72(15) | C9   | C8   | S2A  | 121.4(5)   |



|            |    |                  |            |    |    |    |            |
|------------|----|------------------|------------|----|----|----|------------|
| C3         | C2 | C1A <sup>1</sup> | 123.2(9)   | C9 | C8 | C7 | 112.4(2)   |
| C2         | C3 | C4               | 111.76(15) | C8 | C9 | S2 | 112.75(13) |
| C5         | C4 | C3               | 113.24(15) |    |    |    |            |
| 1-x,-y,1-z |    |                  |            |    |    |    |            |

| <b>A</b>         | <b>B</b> | <b>C</b> | <b>D</b>         | <b>Angle/°</b> | <b>A</b>        | <b>B</b> | <b>C</b> | <b>D</b>         | <b>Angle/°</b> |
|------------------|----------|----------|------------------|----------------|-----------------|----------|----------|------------------|----------------|
| S1               | C2       | C3       | C4               | 1.32(18)       | C2 <sup>1</sup> | C1A      | C6       | S2A              | -135(2)        |
| S2               | C6       | C7       | C8               | -1.4(3)        | C2 <sup>1</sup> | C1A      | C6       | C1               | -175(4)        |
| S2A              | C6       | C7       | C8               | 166(5)         | C2 <sup>1</sup> | C1A      | C6       | C7               | -131(2)        |
| S2A              | C8       | C9       | S2               | 0.7(7)         | C2              | C3       | C4       | C5               | -1.0(2)        |
| C1 <sup>1</sup>  | C1       | C2       | S1               | -86.5(2)       | C3              | C4       | C5       | S1               | 0.20(19)       |
| C1 <sup>1</sup>  | C1       | C2       | C1A <sup>1</sup> | 2.1(14)        | C5              | S1       | C2       | C1               | -177.34(14)    |
| C1 <sup>1</sup>  | C1       | C2       | C3               | 98.0(3)        | C5              | S1       | C2       | C1A <sup>1</sup> | 140.5(10)      |
| C1 <sup>1</sup>  | C1       | C6       | S2               | 25.5(3)        | C5              | S1       | C2       | C3               | -1.04(13)      |
| C1 <sup>1</sup>  | C1       | C6       | S2A              | -156.1(6)      | C6              | S2       | C9       | C8               | 0.55(14)       |
| C1 <sup>1</sup>  | C1       | C6       | C1A              | 1.2(15)        | C6              | S2A      | C8       | C7               | 11(4)          |
| C1 <sup>1</sup>  | C1       | C6       | C7               | -158.8(3)      | C6              | S2A      | C8       | C9               | -1.6(9)        |
| C1               | C2       | C3       | C4               | 177.12(16)     | C6              | C1       | C2       | S1               | 92.23(16)      |
| C1               | C6       | C7       | C8               | -177.65(19)    | C6              | C1       | C2       | C1A <sup>1</sup> | -179.2(14)     |
| C1A <sup>1</sup> | C1A      | C6       | S2               | -161(2)        | C6              | C1       | C2       | C3               | -83.3(2)       |
| C1A <sup>1</sup> | C1A      | C6       | S2A              | 39(4)          | C6              | C7       | C8       | S2A              | -167(5)        |
| C1A <sup>1</sup> | C1A      | C6       | C1               | -1.0(12)       | C6              | C7       | C8       | C9               | 1.8(4)         |
| C1A <sup>1</sup> | C1A      | C6       | C7               | 43(4)          | C7              | C8       | C9       | S2               | -1.4(3)        |
| C1A <sup>1</sup> | C2       | C3       | C4               | -134.9(11)     | C8              | S2A      | C6       | S2               | 2.0(9)         |
| C1A              | C6       | C7       | C8               | 152(2)         | C8              | S2A      | C6       | C1               | -176.6(4)      |
| C2               | S1       | C5       | C4               | 0.48(14)       | C8              | S2A      | C6       | C1A              | 158.3(17)      |
| C2               | C1       | C6       | S2               | -153.13(12)    | C8              | S2A      | C6       | C7               | -11(4)         |
| C2               | C1       | C6       | S2A              | 25.3(6)        | C9              | S2       | C6       | S2A              | -1.7(7)        |
| C2               | C1       | C6       | C1A              | -177.5(15)     | C9              | S2       | C6       | C1               | 176.67(14)     |
| C2               | C1       | C6       | C7               | 22.6(3)        | C9              | S2       | C6       | C1A              | -169.0(9)      |
| C2 <sup>1</sup>  | C1A      | C6       | S2               | 24(2)          | C9              | S2       | C6       | C7               | 0.5(2)         |

<sup>1</sup>-x,-y,1-z

**Table SI8 Hydrogen Atom Coordinates ( $\text{\AA}\times 10^4$ ) and Isotropic Displacement Parameters ( $\text{\AA}^2\times 10^3$ ) for TTE.**

| Atom | <i>x</i> | <i>y</i> | <i>z</i> | <b>U(eq)</b> |
|------|----------|----------|----------|--------------|
| H3   | -948     | 3247     | 3579     | 18           |
| H4   | 582      | 4586     | 2328     | 18           |
| H5   | 3044     | 3471     | 2742     | 18           |
| H7   | 805      | 3395     | 6643     | 19           |
| H8B  | 1521     | 3604     | 9454     | 21           |
| H8A  | 1472     | 3648     | 9380     | 21           |
| H9   | 1706     | 1303     | 10604    | 21           |

**Table SI9 Atomic Occupancy for TTE.**

| Atom | <i>Occupancy</i> | Atom | <i>Occupancy</i> | Atom | <i>Occupancy</i> |
|------|------------------|------|------------------|------|------------------|
| S2   | 0.93             | S2A  | 0.07             | C1   | 0.94             |
| C1A  | 0.06             | C7   | 0.93             | H7   | 0.93             |
| H8B  | 0.07             | H8A  | 0.93             |      |                  |

## *DTE Crystal Data*

|                                             |                                                              |
|---------------------------------------------|--------------------------------------------------------------|
| Identification code                         | DTE                                                          |
| Empirical formula                           | C <sub>10</sub> H <sub>8</sub> S <sub>2</sub>                |
| Formula weight                              | 192.28                                                       |
| Temperature/K                               | 99.99(10)                                                    |
| Crystal system                              | monoclinic                                                   |
| Space group                                 | P2 <sub>1</sub> /c                                           |
| a/Å                                         | 5.81321(19)                                                  |
| b/Å                                         | 7.5432(3)                                                    |
| c/Å                                         | 10.2777(3)                                                   |
| α/°                                         | 90                                                           |
| β/°                                         | 93.249(3)                                                    |
| γ/°                                         | 90                                                           |
| Volume/Å <sup>3</sup>                       | 449.95(3)                                                    |
| Z                                           | 2                                                            |
| ρ <sub>calc</sub> /g/cm <sup>3</sup>        | 1.419                                                        |
| μ/mm <sup>-1</sup>                          | 0.526                                                        |
| F(000)                                      | 200.0                                                        |
| Crystal size/mm <sup>3</sup>                | 0.25 × 0.15 × 0.1                                            |
| Radiation                                   | MoKα (λ = 0.71073)                                           |
| 2θ range for data collection/°              | 7.944 to 51.994                                              |
| Index ranges                                | -7 ≤ h ≤ 5, -9 ≤ k ≤ 8, -12 ≤ l ≤ 12                         |
| Reflections collected                       | 2262                                                         |
| Independent reflections                     | 848 [R <sub>int</sub> = 0.0193, R <sub>sigma</sub> = 0.0232] |
| Data/restraints/parameters                  | 848/15/57                                                    |
| Completeness to theta = 50°                 | 95.6%                                                        |
| Goodness-of-fit on F <sup>2</sup>           | 1.005                                                        |
| Final R indexes [I ≥ 2σ (I)]                | R <sub>1</sub> = 0.0368, wR <sub>2</sub> = 0.0901            |
| Final R indexes [all data]                  | R <sub>1</sub> = 0.0409, wR <sub>2</sub> = 0.0930            |
| Largest diff. peak/hole / e Å <sup>-3</sup> | 0.45/-0.54                                                   |

**Table SI11 Fractional Atomic Coordinates ( $\times 10^4$ ) and Equivalent Isotropic Displacement Parameters ( $\text{\AA}^2 \times 10^3$ ) for DTE.  $U_{eq}$  is defined as 1/3 of the trace of the orthogonalized  $U_{ij}$  tensor.**

| Atom | <i>x</i>   | <i>y</i>  | <i>z</i>  | $U_{eq}$ |
|------|------------|-----------|-----------|----------|
| S1   | 3914.9(12) | 6348.1(9) | 3605.3(8) | 17.5(2)  |
| S1A  | 827(15)    | 4672(11)  | 2227(8)   | 23(3)    |
| C1   | 1389(4)    | 5140(3)   | 3346(2)   | 13.3(5)  |
| C1A  | 2020(30)   | 5470(20)  | 3625(15)  | 9(4)     |
| C2   | 992(6)     | 4666(4)   | 1989(3)   | 13.1(10) |
| C2A  | 4060(30)   | 6260(30)  | 3305(15)  | 14(7)    |
| C3   | 2864(4)    | 5345(3)   | 1275(2)   | 20.5(5)  |
| C4   | 4500(4)    | 6254(3)   | 2001(2)   | 19.1(5)  |
| C5   | -137(4)    | 4728(3)   | 4375(2)   | 15.6(5)  |
| C5A  | 930(40)    | 5360(30)  | 4880(20)  | 19(5)    |

**Table SI12 Anisotropic Displacement Parameters ( $\text{\AA}^2 \times 10^3$ ) for DTE. The Anisotropic displacement factor exponent takes the form:  $-2\pi^2[h^2a^{*2}U_{11}+2hka^*b^*U_{12}+\dots]$ .**

| Atom | $U_{11}$ | $U_{22}$ | $U_{33}$ | $U_{23}$ | $U_{13}$ | $U_{12}$ |
|------|----------|----------|----------|----------|----------|----------|
| C3   | 26.2(11) | 18.8(10) | 16.6(10) | 1.6(8)   | 1.5(8)   | 5.6(8)   |
| C4   | 17(1)    | 15.5(10) | 25.2(11) | 4.2(7)   | 3.6(8)   | 1.1(8)   |

**Table SI13 Bond Lengths for DTE.**

| Atom | Atom | Length/ $\text{\AA}$ | Atom | Atom             | Length/ $\text{\AA}$ |
|------|------|----------------------|------|------------------|----------------------|
| S1   | C1   | 1.736(3)             | C1A  | C5A              | 1.472(17)            |
| S1   | C4   | 1.704(2)             | C2   | C3               | 1.440(4)             |
| S1A  | C1A  | 1.674(16)            | C2A  | C4               | 1.379(14)            |
| S1A  | C3   | 1.658(9)             | C3   | C4               | 1.360(3)             |
| C1   | C2   | 1.445(4)             | C5   | C5 <sup>1</sup>  | 1.349(4)             |
| C1   | C5   | 1.452(3)             | C5A  | C5A <sup>1</sup> | 1.24(5)              |
| C1A  | C2A  | 1.381(14)            |      |                  |                      |

<sup>1</sup>-X,1-Y,1-Z

| Atom | Atom | Atom | Angle/°    | Atom             | Atom | Atom | Angle/°    |
|------|------|------|------------|------------------|------|------|------------|
| C4   | S1   | C1   | 92.47(11)  | C3               | C2   | C1   | 108.7(3)   |
| C3   | S1A  | C1A  | 96.9(7)    | C4               | C2A  | C1A  | 116.1(15)  |
| C2   | C1   | S1   | 111.4(2)   | C4               | C3   | S1A  | 109.4(3)   |
| C2   | C1   | C5   | 125.4(3)   | C4               | C3   | C2   | 115.1(2)   |
| C5   | C1   | S1   | 123.13(19) | C3               | C4   | S1   | 112.29(17) |
| C2A  | C1A  | S1A  | 105.7(12)  | C3               | C4   | C2A  | 111.8(9)   |
| C2A  | C1A  | C5A  | 130.9(17)  | C5 <sup>1</sup>  | C5   | C1   | 125.8(3)   |
| C5A  | C1A  | S1A  | 123.4(16)  | C5A <sup>1</sup> | C5A  | C1A  | 129(3)     |

<sup>1</sup>-X,1-Y,1-Z

| A   | B   | C   | D                | Angle/°   | A   | B   | C   | D                | Angle/°     |
|-----|-----|-----|------------------|-----------|-----|-----|-----|------------------|-------------|
| S1  | C1  | C2  | C3               | 0.5(3)    | C2  | C1  | C5  | C5 <sup>1</sup>  | -175.0(3)   |
| S1  | C1  | C5  | C5 <sup>1</sup>  | 2.9(4)    | C2  | C3  | C4  | S1               | 0.4(3)      |
| S1A | C1A | C2A | C4               | 3.0(16)   | C2A | C1A | C5A | C5A <sup>1</sup> | 180(3)      |
| S1A | C1A | C5A | C5A <sup>1</sup> | 2(5)      | C3  | S1A | C1A | C2A              | -0.7(10)    |
| S1A | C3  | C4  | C2A              | 3.6(10)   | C3  | S1A | C1A | C5A              | 177.2(15)   |
| C1  | S1  | C4  | C3               | -0.04(17) | C4  | S1  | C1  | C2               | -0.30(19)   |
| C1  | C2  | C3  | C4               | -0.6(3)   | C4  | S1  | C1  | C5               | -178.45(19) |
| C1A | S1A | C3  | C4               | -1.7(7)   | C5  | C1  | C2  | C3               | 178.6(2)    |
| C1A | C2A | C4  | C3               | -4.5(16)  | C5A | C1A | C2A | C4               | -174.7(18)  |

<sup>1</sup>-X,1-Y,1-Z

| Atom | x        | y        | z        | U(eq) |
|------|----------|----------|----------|-------|
| H2   | -289     | 4015     | 1629     | 16    |
| H2A  | 5104     | 6765     | 3946     | 17    |
| H3B  | 2885     | 5130     | 365      | 25    |
| H3A  | 3010(50) | 5240(40) | 370(30)  | 25    |
| H4B  | 5789     | 6820     | 1651     | 23    |
| H4A  | 5880(50) | 6820(40) | 1740(30) | 23    |
| H5   | -1443    | 4012     | 4148     | 19    |
| H5A  | 1745     | 5902     | 5598     | 23    |

| <b>Atom</b> | <b>Occupancy</b> | <b>Atom</b> | <b>Occupancy</b> | <b>Atom</b> | <b>Occupancy</b> |
|-------------|------------------|-------------|------------------|-------------|------------------|
| S1          | 0.9              | S1A         | 0.1              | C1          | 0.9              |
| C1A         | 0.1              | C2          | 0.9              | H2          | 0.9              |
| C2A         | 0.1              | H2A         | 0.1              | H3B         | 0.1              |
| H3A         | 0.9              | H4B         | 0.1              | H4A         | 0.9              |
| C5          | 0.92             | H5          | 0.92             | C5A         | 0.08             |
| H5A         | 0.08             |             |                  |             |                  |

### *sl-TTE Crystal Data*

|                                             |                                                               |
|---------------------------------------------|---------------------------------------------------------------|
| Identification code                         | sl-TTE                                                        |
| Empirical formula                           | C <sub>18</sub> H <sub>10</sub> S <sub>4</sub>                |
| Formula weight                              | 354.50                                                        |
| Temperature/K                               | 100.1(5)                                                      |
| Crystal system                              | monoclinic                                                    |
| Space group                                 | P2 <sub>1</sub> /n                                            |
| a/Å                                         | 10.91901(14)                                                  |
| b/Å                                         | 8.76755(11)                                                   |
| c/Å                                         | 15.8755(2)                                                    |
| $\alpha$ /°                                 | 90                                                            |
| $\beta$ /°                                  | 93.1272(11)                                                   |
| $\gamma$ /°                                 | 90                                                            |
| Volume/Å <sup>3</sup>                       | 1517.54(3)                                                    |
| Z                                           | 4                                                             |
| $\rho_{\text{calc}}/\text{cm}^3$            | 1.552                                                         |
| $\mu/\text{mm}^{-1}$                        | 5.668                                                         |
| F(000)                                      | 728.0                                                         |
| Crystal size/mm <sup>3</sup>                | 0.3 × 0.1 × 0.05                                              |
| Radiation                                   | CuK $\alpha$ ( $\lambda$ = 1.54184)                           |
| 2 $\theta$ range for data collection/°      | 9.592 to 133.996                                              |
| Index ranges                                | -8 ≤ h ≤ 13, -10 ≤ k ≤ 10, -18 ≤ l ≤ 18                       |
| Reflections collected                       | 7920                                                          |
| Independent reflections                     | 2681 [R <sub>int</sub> = 0.0171, R <sub>sigma</sub> = 0.0161] |
| Data/restraints/parameters                  | 2681/0/205                                                    |
| Completeness to theta = 66.5°               | 99.0%                                                         |
| Goodness-of-fit on F <sup>2</sup>           | 1.002                                                         |
| Final R indexes [I >= 2 $\sigma$ (I)]       | R <sub>1</sub> = 0.0261, wR <sub>2</sub> = 0.0652             |
| Final R indexes [all data]                  | R <sub>1</sub> = 0.0274, wR <sub>2</sub> = 0.0661             |
| Largest diff. peak/hole / e Å <sup>-3</sup> | 0.26/-0.28                                                    |

**Table SI19 Fractional Atomic Coordinates ( $\times 10^4$ ) and Equivalent Isotropic Displacement Parameters ( $\text{\AA}^2 \times 10^3$ ) for sl-TTE.  $U_{eq}$  is defined as 1/3 of the trace of the orthogonalised  $U_{ij}$  tensor.**

| Atom | <i>x</i>   | <i>y</i>   | <i>z</i>   | $U_{eq}$  |
|------|------------|------------|------------|-----------|
| S1   | 1275.8(3)  | 3113.8(4)  | 790.3(2)   | 18.41(11) |
| S2   | 6315.9(3)  | 4576.6(4)  | 2582.7(2)  | 18.34(11) |
| S3   | 5254.6(4)  | 8328.0(4)  | 1973.5(2)  | 21.22(11) |
| S4   | 2399.4(12) | 5729.5(13) | -608.8(5)  | 20.3(2)   |
| S4A  | 2242.6(15) | 7985.9(13) | 740.1(9)   | 17.7(3)   |
| C1   | 3257.4(14) | 5119.8(17) | 1038.1(9)  | 14.9(3)   |
| C2   | 4393.9(14) | 5454.2(17) | 1439.5(9)  | 15.2(3)   |
| C11  | 2689.2(14) | 3719.3(17) | 1223.0(9)  | 15.5(3)   |
| C12  | 3193.6(14) | 2654.5(17) | 1804.8(9)  | 16.0(3)   |
| C13  | 2419.5(15) | 1345.9(18) | 1881(1)    | 18.7(3)   |
| C14  | 1375.1(15) | 1454.6(18) | 1377.4(10) | 20.5(3)   |
| C21  | 4911.9(14) | 4383.7(17) | 2023.7(9)  | 15.5(3)   |
| C22  | 4343.4(14) | 3003.5(17) | 2223.8(9)  | 16.2(3)   |
| C23  | 5057.6(15) | 2141.2(18) | 2846.5(10) | 19.7(3)   |
| C24  | 6125.6(15) | 2847.7(18) | 3085.4(10) | 22.0(3)   |
| C31  | 5040.5(13) | 6877.0(17) | 1242.9(9)  | 15.6(3)   |
| C32  | 5471.8(13) | 7308.2(17) | 464.8(10)  | 15.9(3)   |
| C33  | 5993.6(14) | 8795.7(19) | 500.3(10)  | 21.5(3)   |
| C34  | 5932.4(15) | 9480.4(19) | 1264.3(11) | 22.2(3)   |
| C41  | 2644.1(13) | 6195.3(17) | 435.4(9)   | 16.0(3)   |
| C42  | 2243(6)    | 7623(6)    | 593(4)     | 17.7(3)   |
| C42A | 2399(7)    | 5961(9)    | -402(4)    | 20.3(2)   |
| C43  | 1720.8(15) | 8414.7(19) | -202.0(11) | 22.6(3)   |
| C44  | 1808.2(15) | 7393(2)    | -831.8(10) | 23.5(4)   |



**Table SI20 Anisotropic Displacement Parameters ( $\text{\AA}^2 \times 10^3$ ) for sl-TTE. The Anisotropic displacement factor exponent takes the form:  $-2\pi^2[h^2a^{*2}U_{11}+2hka^*b^*U_{12}+\dots]$ .**

| Atom | $U_{11}$  | $U_{22}$ | $U_{33}$  | $U_{23}$  | $U_{13}$  | $U_{12}$  |
|------|-----------|----------|-----------|-----------|-----------|-----------|
| S1   | 17.51(19) | 18.2(2)  | 19.1(2)   | 1.02(14)  | -2.52(14) | -3.86(14) |
| S2   | 18.05(19) | 18.4(2)  | 17.90(19) | 0.03(14)  | -5.65(14) | 0.67(14)  |
| S3   | 26.6(2)   | 18.2(2)  | 18.4(2)   | -1.47(14) | -3.26(15) | -4.77(15) |
| S4   | 26.7(3)   | 21.2(5)  | 12.4(5)   | 0.3(4)    | -4.9(4)   | 2.1(3)    |
| S4A  | 22.3(3)   | 12.4(7)  | 18.2(7)   | 0.1(4)    | -1.4(4)   | 3.3(5)    |
| C1   | 17.5(7)   | 14.6(7)  | 12.5(7)   | -1.4(6)   | -0.2(6)   | 0.2(6)    |
| C2   | 18.2(7)   | 14.5(7)  | 12.8(7)   | -2.2(5)   | -0.3(6)   | 0.5(6)    |
| C11  | 17.5(7)   | 16.1(7)  | 13.0(7)   | -2.4(6)   | 0.2(5)    | -0.5(6)   |
| C12  | 20.1(7)   | 14.3(7)  | 13.8(7)   | -1.8(6)   | 1.7(6)    | 1.0(6)    |
| C13  | 22.5(8)   | 16.1(7)  | 17.5(7)   | -0.1(6)   | 2.3(6)    | -0.8(6)   |
| C14  | 22.3(8)   | 17.2(8)  | 22.3(8)   | 0.3(6)    | 2.9(6)    | -4.9(6)   |
| C21  | 16.6(7)   | 16.5(7)  | 13.1(7)   | -3.2(6)   | -1.0(5)   | 1.4(6)    |
| C22  | 19.8(8)   | 15.0(7)  | 13.8(7)   | -1.7(6)   | 0.4(6)    | 1.7(6)    |
| C23  | 25.0(8)   | 16.2(7)  | 17.5(7)   | 0.7(6)    | -1.2(6)   | 1.8(6)    |
| C24  | 26.8(8)   | 19.5(8)  | 18.9(8)   | 1.8(6)    | -4.9(6)   | 4.8(6)    |
| C31  | 14.8(7)   | 15.0(7)  | 16.5(7)   | -1.2(6)   | -4.4(6)   | 0.9(6)    |
| C32  | 12.8(7)   | 13.5(7)  | 21.2(7)   | -0.2(6)   | 0.3(6)    | 0.8(6)    |
| C33  | 16.4(7)   | 23.6(8)  | 24.2(8)   | 7.2(6)    | -1.2(6)   | -1.4(6)   |
| C34  | 19.0(8)   | 17.7(8)  | 29.3(9)   | 2.3(6)    | -6.0(6)   | -3.3(6)   |
| C41  | 14.9(7)   | 16.9(7)  | 15.8(7)   | 1.1(6)    | -1.9(6)   | -3.3(6)   |
| C42  | 22.3(3)   | 12.4(7)  | 18.2(7)   | 0.1(4)    | -1.4(4)   | 3.3(5)    |
| C42A | 26.7(3)   | 21.2(5)  | 12.4(5)   | 0.3(4)    | -4.9(4)   | 2.1(3)    |
| C43  | 17.9(8)   | 18.6(8)  | 30.9(9)   | 2.4(7)    | -2.4(6)   | -1.3(6)   |
| C44  | 21.1(8)   | 28.7(9)  | 20.1(8)   | 3.2(7)    | -4.4(6)   | -4.3(7)   |

| Atom | Atom | Length/Å   | Atom | Atom | Length/Å |
|------|------|------------|------|------|----------|
| S1   | C11  | 1.7378(15) | C11  | C12  | 1.405(2) |
| S1   | C14  | 1.7280(16) | C12  | C13  | 1.434(2) |
| S2   | C21  | 1.7372(15) | C12  | C22  | 1.422(2) |
| S2   | C24  | 1.7308(17) | C13  | C14  | 1.360(2) |
| S3   | C31  | 1.7288(15) | C21  | C22  | 1.404(2) |
| S3   | C34  | 1.7108(17) | C22  | C23  | 1.440(2) |
| S4   | C41  | 1.7140(16) | C23  | C24  | 1.356(2) |
| S4   | C44  | 1.626(2)   | C31  | C32  | 1.398(2) |
| S4A  | C41  | 1.7069(17) | C32  | C33  | 1.423(2) |
| S4A  | C43  | 1.615(2)   | C33  | C34  | 1.358(2) |
| C1   | C2   | 1.395(2)   | C41  | C42  | 1.354(6) |
| C1   | C11  | 1.414(2)   | C41  | C42A | 1.357(7) |
| C1   | C41  | 1.478(2)   | C42  | C43  | 1.524(7) |
| C2   | C21  | 1.416(2)   | C42A | C44  | 1.553(8) |
| C2   | C31  | 1.475(2)   | C43  | C44  | 1.350(3) |

| Atom | Atom | Atom | Angle/°    | Atom | Atom | Atom | Angle/°    |
|------|------|------|------------|------|------|------|------------|
| C14  | S1   | C11  | 90.90(7)   | C21  | C22  | C12  | 118.01(14) |
| C24  | S2   | C21  | 91.46(8)   | C21  | C22  | C23  | 112.23(14) |
| C34  | S3   | C31  | 92.33(8)   | C24  | C23  | C22  | 112.18(14) |
| C44  | S4   | C41  | 92.06(9)   | C23  | C24  | S2   | 113.20(12) |
| C43  | S4A  | C41  | 91.99(9)   | C2   | C31  | S3   | 121.95(11) |
| C2   | C1   | C11  | 118.51(14) | C32  | C31  | S3   | 110.73(11) |
| C2   | C1   | C41  | 121.48(13) | C32  | C31  | C2   | 127.15(13) |
| C11  | C1   | C41  | 120.01(13) | C31  | C32  | C33  | 111.49(14) |
| C1   | C2   | C21  | 118.27(14) | C34  | C33  | C32  | 113.66(14) |
| C1   | C2   | C31  | 120.35(13) | C33  | C34  | S3   | 111.76(12) |
| C21  | C2   | C31  | 121.37(13) | C1   | C41  | S4   | 121.03(12) |
| C1   | C11  | S1   | 125.00(12) | C1   | C41  | S4A  | 121.18(12) |
| C12  | C11  | S1   | 111.40(11) | C42  | C41  | S4   | 111.4(3)   |
| C12  | C11  | C1   | 123.58(14) | C42  | C41  | C1   | 127.6(3)   |
| C11  | C12  | C13  | 112.05(14) | C42A | C41  | S4A  | 112.1(4)   |
| C11  | C12  | C22  | 117.99(14) | C42A | C41  | C1   | 126.6(4)   |
| C22  | C12  | C13  | 129.96(14) | C41  | C42  | C43  | 112.2(4)   |
| C14  | C13  | C12  | 111.94(14) | C41  | C42A | C44  | 111.3(5)   |
| C13  | C14  | S1   | 113.70(12) | C44  | C43  | S4A  | 119.72(14) |
| C2   | C21  | S2   | 125.46(12) | C44  | C43  | C42  | 105.9(2)   |
| C22  | C21  | S2   | 110.91(11) | C43  | C44  | S4   | 118.50(13) |
| C22  | C21  | C2   | 123.63(14) | C43  | C44  | C42A | 104.8(3)   |
| C12  | C22  | C23  | 129.77(15) |      |      |      |            |

| <b>A</b> | <b>B</b> | <b>C</b> | <b>D</b> | <b>Angle/°</b> |  | <b>A</b> | <b>B</b> | <b>C</b> | <b>D</b> | <b>Angle/°</b> |
|----------|----------|----------|----------|----------------|--|----------|----------|----------|----------|----------------|
| S1       | C11      | C12      | C13      | 0.67(16)       |  | C12      | C13      | C14      | S1       | 0.26(18)       |
| S1       | C11      | C12      | C22      | -178.95(11)    |  | C12      | C22      | C23      | C24      | 178.81(15)     |
| S2       | C21      | C22      | C12      | -178.68(11)    |  | C13      | C12      | C22      | C21      | 179.76(15)     |
| S2       | C21      | C22      | C23      | 1.24(16)       |  | C13      | C12      | C22      | C23      | -0.1(3)        |
| S3       | C31      | C32      | C33      | 1.62(16)       |  | C14      | S1       | C11      | C1       | -178.81(14)    |
| S4       | C41      | C42      | C43      | -1.4(5)        |  | C14      | S1       | C11      | C12      | -0.45(12)      |
| S4A      | C41      | C42A     | C44      | -0.7(6)        |  | C21      | S2       | C24      | C23      | 0.21(13)       |
| S4A      | C43      | C44      | C42A     | 2.3(4)         |  | C21      | C2       | C31      | S3       | -68.83(18)     |
| C1       | C2       | C21      | S2       | 179.55(11)     |  | C21      | C2       | C31      | C32      | 116.35(17)     |
| C1       | C2       | C21      | C22      | -0.2(2)        |  | C21      | C22      | C23      | C24      | -1.1(2)        |
| C1       | C2       | C31      | S3       | 112.33(14)     |  | C22      | C12      | C13      | C14      | 178.96(15)     |
| C1       | C2       | C31      | C32      | -62.5(2)       |  | C22      | C23      | C24      | S2       | 0.46(18)       |
| C1       | C11      | C12      | C13      | 179.07(14)     |  | C24      | S2       | C21      | C2       | 179.40(14)     |
| C1       | C11      | C12      | C22      | -0.6(2)        |  | C24      | S2       | C21      | C22      | -0.84(12)      |
| C1       | C41      | C42      | C43      | 176.8(2)       |  | C31      | S3       | C34      | C33      | 0.13(13)       |
| C1       | C41      | C42A     | C44      | -176.9(2)      |  | C31      | C2       | C21      | S2       | 0.7(2)         |
| C2       | C1       | C11      | S1       | 179.64(11)     |  | C31      | C2       | C21      | C22      | -179.04(14)    |
| C2       | C1       | C11      | C12      | 1.5(2)         |  | C31      | C32      | C33      | C34      | -1.58(19)      |
| C2       | C1       | C41      | S4       | 115.15(15)     |  | C32      | C33      | C34      | S3       | 0.80(18)       |
| C2       | C1       | C41      | S4A      | -60.68(19)     |  | C34      | S3       | C31      | C2       | -176.61(13)    |
| C2       | C1       | C41      | C42      | -62.8(4)       |  | C34      | S3       | C31      | C32      | -1.02(12)      |
| C2       | C1       | C41      | C42A     | 115.2(5)       |  | C41      | S4       | C44      | C43      | -0.42(16)      |
| C2       | C21      | C22      | C12      | 1.1(2)         |  | C41      | S4A      | C43      | C44      | -2.43(17)      |
| C2       | C21      | C22      | C23      | -178.99(14)    |  | C41      | C1       | C2       | C21      | 178.57(13)     |
| C2       | C31      | C32      | C33      | 176.92(14)     |  | C41      | C1       | C2       | C31      | -2.6(2)        |
| C11      | S1       | C14      | C13      | 0.11(13)       |  | C41      | C1       | C11      | S1       | 0.0(2)         |
| C11      | C1       | C2       | C21      | -1.1(2)        |  | C41      | C1       | C11      | C12      | -178.17(14)    |
| C11      | C1       | C2       | C31      | 177.81(13)     |  | C41      | C42      | C43      | C44      | 1.0(5)         |
| C11      | C1       | C41      | S4       | -65.22(18)     |  | C41      | C42A     | C44      | C43      | -0.9(6)        |
| C11      | C1       | C41      | S4A      | 118.95(15)     |  | C42      | C43      | C44      | S4       | -0.3(3)        |
| C11      | C1       | C41      | C42      | 116.8(4)       |  | C43      | S4A      | C41      | C1       | 178.06(13)     |
| C11      | C1       | C41      | C42A     | -65.2(5)       |  | C43      | S4A      | C41      | C42A     | 1.7(4)         |
| C11      | C12      | C13      | C14      | -0.60(19)      |  | C44      | S4       | C41      | C1       | -177.22(13)    |
| C11      | C12      | C22      | C21      | -0.7(2)        |  | C44      | S4       | C41      | C42      | 1.0(3)         |
| C11      | C12      | C22      | C23      | 179.39(15)     |  |          |          |          |          |                |

| <b>Atom</b> | <b>x</b> | <b>y</b> | <b>z</b> | <b>U(eq)</b> |
|-------------|----------|----------|----------|--------------|
| H13         | 2613     | 504      | 2240     | 22           |
| H14         | 758      | 690      | 1351     | 25           |
| H23         | 4809     | 1188     | 3065     | 24           |
| H24         | 6710     | 2435     | 3488     | 26           |
| H32         | 5423     | 6686     | -26      | 19           |
| H33         | 6351     | 9266     | 34       | 26           |
| H34         | 6230     | 10478    | 1390     | 27           |
| H42         | 2283     | 8079     | 1137     | 21           |
| H42A        | 2567     | 5039     | -688     | 24           |
| H43A        | 1354     | 9382     | -312     | 27           |
| H43         | 1400     | 9420     | -245     | 27           |
| H44         | 1531     | 7640     | -1393    | 28           |
| H44A        | 1563     | 7522     | -1411    | 28           |

| <b>Atom</b> | <b>Occupancy</b> | <b>Atom</b> | <b>Occupancy</b> | <b>Atom</b> | <b>Occupancy</b> |
|-------------|------------------|-------------|------------------|-------------|------------------|
| S4          | 0.55             | S4A         | 0.45             | C42         | 0.55             |
| H42         | 0.55             | C42A        | 0.45             | H42A        | 0.45             |
| H43A        | 0.45             | H43         | 0.55             | H44         | 0.55             |
| H44A        | 0.45             |             |                  |             |                  |

## Materials and general information

Tetrathienylethene TTE has been previously synthesized by McMurry coupling at *Università degli Studi di Milano*, in the laboratory and under the supervision of Professor Emanuela Licandro, and used as such for the experiments, subject of this work, after checking its purity by HPLC.

THF was distilled under normal pressure from sodium benzophenone ketyl, under nitrogen immediately prior to use. The reaction outcome was monitored by TLC silica gel plates, 60, F254. The purity of the investigated molecules was checked both <sup>1</sup>H-NMR and HPLC. <sup>1</sup>H-NMR spectra were performed by using Acetone-*d*<sub>6</sub> as solvent, tetramethylsilane (TMS δ=0 ppm) as the internal reference and by adding some drops of CS<sub>2</sub> in sl-TTE and fl-TTE case to promote the solubility of the molecule in the deuterated solvent. HPLC chromatograms were recorded in reverse phase, isocratic conditions, by using as eluent the mixture CH<sub>3</sub>CN:H<sub>2</sub>O 6:4 or 9:1 (1 mL / min).

## Instruments used for the characterization of sl-TTE and fl-TTE and for the photoluminescence studies.

<sup>1</sup>H NMR spectra were recorded on a Bruker ARX 400 NMR spectrometer. Mass spectra were recorded on a GCT premier CAB048 mass spectrophotometer operating in a MALDI-TOF mode. UV-vis absorption spectra were recorded on LIBRA BIOCHROME spectrophotometer. Photoluminescence spectra were recorded on a Perkin-Elmer LS 55 spectrofluorometer. The solid state fluorescence quantum yield were measured by the absolute PL quantum yield spectrometer C11347 of Hamamatsu with a calibrated integrating sphere. The lifetime were determined by the compact fluorescence lifetime spectrometer C11367 of Hamamatsu. HPLC chromatograms were performed on an Agilent 1260 Infinity equipped with a PDA detector and the reverse phase column ZORBAX SB-C<sub>18</sub> 4.6 X 150 mm, 5 μm particle size.

## Experimental Procedures

### Synthesis of 4,5-bis(thiophene-2-yl)thieno[3,2-e]benzo[b]thiophene (semi-locked TTE; sl-TTE) and tetrathieno[2,3-a:3',2'-c:2'',3''-f:3''',2'''-h]-naphthalene (fully-locked TTE; fl-TTE)<sup>1</sup>

In a typical run for photochemical reactions, 80 mg (0.217 mmol, 1 eq) of tetrakis(2-thienyl)ethene (TTE) were dissolved in 200 mL of toluene (solution color: yellow) and the solution was degassed under N<sub>2</sub> atmosphere for 30 min (Scheme 1). After this time, 116 mg (0.457 mmol, 2 eq) of I<sub>2</sub> were added to the solution (which turned its color from yellow to red) and it was degassed again for other 30 min. Then 50 mL (714 mmol, d=0.83 g mL<sup>-1</sup>) of 2-methyl oxirane (propylene oxide) were added

in the reaction mixture and the solution was degassed for 30 min more. The resulting mixture was irradiated with UV-light from a 500 W high pressure Hg vapor lamp placed in the immersion quartz well under N<sub>2</sub> flow. The reaction was monitored by TLC (eluent: hexane/DCM 8/2) and it was carried on until the consumption of the starting material and the appearance of the final product. The overall reaction time was 20 min. The reaction product precipitated during the photolysis due to its insolubility in the reaction solvent. The crude was washed with DCM and ethanol to remove the alcohol (2-iodoethan-1-ol) byproduct of this reaction, which is soluble in this medium, contrary to the reaction products which are insoluble both in DCM and in ethanol. By washing the residual crude with hexane, it was possible to isolate the intermediate product (4,5-bis(thiophene-2-yl)thieno[3,2-e]benzo[b]thiophene (semi-locked TTE; sl-TTE). By recrystallizing once, the remaining crude from o-xylene the final desired product tetrathieno[2,3-a:3',2'-c:2'',3''-f:3'',2''-h]-naphthalene (fully-locked TTE; fl-TTE) (50 mg 64% yield) was obtained as a micro-crystalline powder. (fl-TTE) <sup>1</sup>H-NMR (400 MHz, some drops of CS<sub>2</sub> + Acetone d<sub>6</sub>): δ, ppm = 8.09 (d, 1H, J = 4.8 Hz), 7.94 (d, 1H, J = 5.2 Hz), UV/Vis (THF), λ/nm: 338; ε, M<sup>-1</sup> cm<sup>-1</sup>: 18.6 E<sup>4</sup>; optical energy gap: 3.67 eV; MS: 352.9 [M<sup>+</sup>]; HPLC (reverse phase, analytical column SB C18, eluent: ACN/H<sub>2</sub>O 9/1) retention time: 7.12 min.

(sl-TTE) <sup>1</sup>H-NMR (400 MHz, some drops of CS<sub>2</sub> + Acetone d<sub>6</sub>): δ, ppm = 7.99 (d, 1H, J = 4.8 Hz), 7.86 (d, 1H, J = 4.8 Hz), 7.54 (d, 1H, J = 4.8 Hz), 7.25 (bs, 1H), 7.11 (bs, 1H), UV/Vis (THF), λ/nm: 320; ε, M<sup>-1</sup> cm<sup>-1</sup>: 7.73 E<sup>3</sup>; optical energy gap: 3.88 eV; MS: 354.9 [M<sup>+</sup>].

#### **Single crystals of C<sub>18</sub>H<sub>12</sub>S<sub>4</sub> (TTE), C<sub>18</sub>H<sub>8</sub>S<sub>2</sub> (DTE) and C<sub>18</sub>H<sub>10</sub>S<sub>4</sub>, sl-TTE.**

TTE and DTE crystals were grown by dissolving the sample in dichloromethane in which they have a very good solubility. Then a co-layer of another solvent (hexane in the case of TTE, methanol in case of DTE) was added very slowly in order to create an interface between the two solvents. The slow diffusion of the co-solvent in which the molecules are not soluble made possible the single crystal growth, which was obtained after one week.

sl-TTE was grown by evaporation from THF.

For the data collection of TTE, DTE, and sl-TTE suitable crystals were selected and mounted on a SuperNova, Dual, Cu at zero, Atlas diffractometer. The crystal was kept at 100.0K during data collection. Using Olex<sup>2</sup> the structure was solved with the ShelXS<sup>3</sup> structure solution program using Direct Methods and refined with the ShelXL<sup>4</sup> refinement package using Least Squares minimization.

Crystal data for C<sub>18</sub>H<sub>12</sub>S<sub>4</sub>, TTE, (MM = 356.52 g/mol): monoclinic, space group P2<sub>1</sub>/n (no. 14), a = 9.3160(2) Å, b = 9.10329(18) Å, c = 9.6346(2) Å, β = 110.853(3)°, V = 763.55(3) Å<sup>3</sup>, Z = 2, T = 100.0(4) K, μ(CuKα) = 5.633 mm<sup>-1</sup>, D<sub>calc</sub> = 1.551 g/cm<sup>3</sup>, 3875 reflections measured (11.34° ≤ 2θ

$\leq 133.94^\circ$ ), 1353 unique ( $R_{\text{int}} = 0.0145$ ,  $R_{\text{sigma}} = 0.0151$ ) which were used in all calculations. The final  $R_1$  was 0.0250 ( $>2\sigma(I)$ ) and  $wR_2$  was 0.0648 (all data).

Crystal data for  $C_{10}H_8S_2$ , DTE ( $M = 192.28$  g/mol): monoclinic, space group P21/c (no. 14),  $a = 5.81321(19)$  Å,  $b = 7.5432(3)$  Å,  $c = 10.2777(3)$  Å,  $\beta = 93.249(3)^\circ$ ,  $V = 449.95(3)$  Å<sup>3</sup>,  $Z = 2$ ,  $T = 99.99(10)$  K,  $\mu(\text{MoK}\alpha) = 0.526$  mm<sup>-1</sup>,  $D_{\text{calc}} = 1.419$  g/cm<sup>3</sup>, 2262 reflections measured ( $7.944^\circ \leq 2\theta \leq 51.994^\circ$ ), 848 unique ( $R_{\text{int}} = 0.0193$ ,  $R_{\text{sigma}} = 0.0232$ ) which were used in all calculations. The final  $R_1$  was 0.0368 ( $I > 2\sigma(I)$ ) and  $wR_2$  was 0.0930 (all data).

Crystal Data for  $C_{18}H_{10}S_4$ , *sl*-TTE ( $M = 354.50$  g/mol): monoclinic, space group P21/n (no. 14),  $a = 10.91901(14)$  Å,  $b = 8.76755(11)$  Å,  $c = 15.8755(2)$  Å,  $\beta = 93.1272(11)^\circ$ ,  $V = 1517.54(3)$  Å<sup>3</sup>,  $Z = 4$ ,  $T = 100.1(5)$  K,  $\mu(\text{CuK}\alpha) = 5.668$  mm<sup>-1</sup>,  $D_{\text{calc}} = 1.552$  g/cm<sup>3</sup>, 7920 reflections measured ( $9.592^\circ \leq 2\theta \leq 133.996^\circ$ ), 2681 unique ( $R_{\text{int}} = 0.0171$ ,  $R_{\text{sigma}} = 0.0161$ ) which were used in all calculations. The final  $R_1$  was 0.0261 ( $I > 2\sigma(I)$ ) and  $wR_2$  was 0.0661 (all data).

### **Refinement model description**

#### ***TTE***

There is a disorder along the rotation axis of the thiophene group S(1), C2(2), C(3), C(4) and C(5), in which the positions of S(2) and C(7) are interconvertible. The occupancies of S(2) and C(7) were found to be 0.93 and 0.07 respectively, and the counterpart of S(2), named as S(2A) was refined as 0.07 for a converged refinement. On the other hand, the counter part of C(7) was not located, a model was tried but the refinement is never stable, probably due to the too small portion of disorder part of C(7) which is shielded by the nearby S(2) atom with large electron density.

Another disorder found at C(1), its counterpart was named as C(1A), with occupancies 0.94 and 0.06 respectively.

The model indicated that there is another position of the double bond bridge which is perpendicular to the major one.

#### ***DTE***

There is a flipping disorder on the plane of S(1) C(2), C(3), C(4) and C(5), in which the positions of S(2) and C(2) are mostly interconvertible. The occupancies of S(2), C(1) and C(2) were found to be 0.90 and 0.10 respectively. The counterpart of S(2), C(1) and C(2), named S(2A), C(1A) and C(2A) respectively, were refined as 0.10 for a converged refinement. The model indicated that there is another position of the double bond bridge C(5) = C(5), which is perpendicular to the major one with occupancy 0.92 for the major part and 0.08 for the minor.

#### ***sl-TTE***

There is a disorder along the rotation axis of the thiophene group S(4), C(41), C(42), C(43) and C(44) which parallel to the bond C(1) and C(41), in which the positions of S(4) and C(42) are interconvertible.

The occupancies of part1 (named S(4) and C(42)) and part2 (named S(4A) and C(42A)) were found to be 0.55 and 0.45 respectively.

1. E. Fischer, J. Larsen, J. B. Christensen, M. Fourmigué, H. G. Madsen and N. Harrit, *J. Org. Chem.*, 1996, **61**, 6997-7005.
2. O. V. Dolomanov, L. J. Bourhis, R. J. Gildea, J. A. K. Howard and H. Puschmann, *J. Appl. Crystallogr.*, 2009, **42**, 339-341.
3. G. Sheldrick, *Acta Crystallographica Section A*, 2008, **64**, 112-122.
4. G. Sheldrick, *Acta Crystallographica Section C*, 2015, **71**, 3-8.
